1 Transcriptomic analysis of temporal shifts in berry development  
2 between two grapevine cultivars of the Pinot family reveals potential  
3 ripening-regulative genes

4

5 Jens Theine<sup>1</sup>, Daniela Holtgräwe<sup>1</sup>, Katja Herzog<sup>2</sup>, Florian Schwander<sup>2</sup>, Anna Kicherer<sup>2</sup>,

6 Ludger Hausmann<sup>2</sup>, Prisca Viehöver<sup>1</sup>, Reinhard Töpfer<sup>2</sup>, Bernd Weisshaar<sup>1\*</sup>

7

8 <sup>1</sup> Bielefeld University, Genetics and Genomics of Plants, Faculty of Biology & Center for

9 Biotechnology, Bielefeld

10 <sup>2</sup> Julius Kühn-Institute, Institute for Grapevine Breeding Geilweilerhof, Siebeldingen

11

12 \*corresponding author:

13 BW Bernd Weisshaar (0000-0002-7635-3473); [bernd.weisshaar@uni-bielefeld.de](mailto:bernd.weisshaar@uni-bielefeld.de)

14

15 JT Jens Theine (0000-0002-6042-373X); [jens.theine@uni-bielefeld.de](mailto:jens.theine@uni-bielefeld.de)

16 DH Daniela Holtgräwe (0000-0002-1062-4576); [dholtgra@cebitec.uni-bielefeld.de](mailto:dholtgra@cebitec.uni-bielefeld.de)

17 KH Katja Herzog; [katja.herzog@julius-kuehn.de](mailto:katja.herzog@julius-kuehn.de)

18 FS Florian Schwander; [florian.schwander@julius-kuehn.de](mailto:florian.schwander@julius-kuehn.de)

19 AK Anna Kicherer; [anna.kicherer@julius-kuehn.de](mailto:anna.kicherer@julius-kuehn.de)

20 LH Ludger Hausmann (0000-0002-4046-9626); [ludger.hausmann@julius-kuehn.de](mailto:ludger.hausmann@julius-kuehn.de)

21 PV Prisca Viehöver; [viehoeve@cebitec.uni-bielefeld.de](mailto:viehoeve@cebitec.uni-bielefeld.de)

22 RT Reinhard Töpfer (0000-0003-1569-2495); [reinhard.toepfer@julius-kuehn.de](mailto:reinhard.toepfer@julius-kuehn.de)

23

24 **Abstract**

25 **Background**

26 Grapevine cultivars of the Pinot family represent in the broader sense clonally propagated  
27 mutants with clear-cut phenotypes, such as different color or shifted ripening time, that  
28 result in major phenotypic and physiological differences as well as changes in important  
29 viticultural traits. Specifically, the cultivars 'Pinot Noir' (PN) and 'Pinot Noir Precoce' (PNP,  
30 early ripening) flower at the same time, but vary for the beginning of berry ripening  
31 (véraison) and consequently for the harvest time. Apart from the genotype, seasonal climatic  
32 conditions (i.e. high temperatures) also affect ripening times. To reveal possible ripening-  
33 regulatory genes affecting the timing of the start of ripening, we investigated differences in  
34 gene expression profiles between PN and PNP throughout berry development with a closely  
35 meshed time series and in two years.

36 **Results**

37 The difference in the duration of berry formation between PN and PNP was quantified to be  
38 about two weeks under the growth conditions applied, using plant material with a proven  
39 clonal relationship of PN and PNP. Clusters of co-expressed genes and differentially  
40 expressed genes (DEGs) were detected which reflect the shift in the beginning of ripening at  
41 the level of gene expression profiles. Functional annotation of these DEGs fits to phenotypic  
42 and physiological changes during berry development. In total, we observed between PN and  
43 PNP 3,342 DEGs in 2014 and 2,745 DEGs in 2017. The intersection of both years comprises  
44 1,923 DEGs. Among these, 388 DEGs were identified as véraison-specific and 12 were  
45 considered as candidates for a regulatory effect on berry ripening time. The expression  
46 profiles revealed two candidate genes for Ripening Time Control, designated *VvIRTIC1* and

47 *VvIRTIC2* (VIT\_210s0071g01145 and VIT\_200s0366g00020, respectively) that may contribute  
48 to controlling the phenotypic difference between PN and PNP.

#### 49 **Conclusions**

50 Many of the 1,923 DEGs identified show highly similar expression profiles in both cultivars as  
51 far as accelerated berry formation of PNP is concerned. Putative ripening-regulatory genes  
52 differentially expressed between PNP and PN as well as véraison-specific genes were  
53 identified. We point out potential connections of these genes to molecular events during  
54 berry development and discuss potential ripening time controlling candidate genes, two of  
55 which are already differentially expressed in the early berry development phase. Several  
56 down-regulated genes are annotated to encode auxin response factors / ARFs. Conceivably,  
57 changes in auxin signaling may realize the earlier ripening phenotype of PNP.

58

#### 59 **Key words**

60 *Vitis vinifera*, Pinot Noir, Pinot Noir Precoce, grapevine, berry ripening, fruit development,  
61 differential gene expression, transcriptome profiling, ripening time control, véraison

62

## 63 **Background**

64 *Vitis vinifera subsp. vinifera* (grapevine) belongs to the family *Vitaceae*. With 6,000 to 11,000  
65 cultivars, it is one of the most important perennial crops worldwide [1]. Grapevine fruit  
66 development can be divided into two physiological phases, berry formation and berry  
67 ripening. The time of véraison refers to the transition of both phases whereby each phase is  
68 represented by a sigmoidal growth curve of development [2]. The progress through  
69 development is described by stages referred to as "BBCH stages" that have been defined for  
70 several crops including grapevine [3, 4]. The first physiological phase described as berry  
71 formation (berry initiation and growth with cell divisions) is lasting from the end of flowering  
72 (BBCH71) until the majority of berries are touching each other (BBCH79), approximately 60  
73 days later. The developmental stage of véraison (BBCH81) depicts the end of berry formation  
74 and the start of berry ripening [2]. Phenotypically, véraison is the developmental switch  
75 when the berries start to soften, accompanied by the onset of accumulation of  
76 phenylpropanoids. In red grapevine cultivars, véraison is also indicated by a color change of  
77 the berries that is caused by the beginning of accumulation of anthocyanins which are one  
78 class of phenylpropanoids. Members of the well-studied protein superfamily of R2R3-MYB  
79 transcription factors (TFs) are considered to be mainly accountable for controlling  
80 anthocyanin accumulation [5-7]. After véraison, berry ripening continues until harvest  
81 (BBCH89) with cell enlargement, sugar accumulation and acidity decline.

82 Anthropogenic climate change is resulting in successively earlier ripening of grapes with a  
83 significant impact on berry quality and on typicity of a desired wine style [8]. In addition, the  
84 time of véraison and for harvest of a given cultivar may differ greatly, driven by regional  
85 and/or year-dependent differences in weather conditions. Obviously, this calls for a better  
86 molecular understanding of the control of ripening time in grapevine.

87 Comparison of grapevine cultivars grown at the same environmental conditions often  
88 uncovers differences in ripening time. However, the underlying genetic factors are mostly  
89 unknown. Previous studies have elucidated how ripening time is affected by external factors.  
90 For example, the effect of phytohormones on berry ripening has been widely studied [1]. In  
91 general, fruit growth is discussed to be controlled by several phytohormones, which play  
92 essential roles to trigger or delay ripening processes [9]. In grapevine as a non-climacteric  
93 fruit, effects of abscisic acid (ABA) have been investigated in many studies and ABA is  
94 considered to trigger ripening [10-12]. Furthermore, it was shown that ABA is involved in  
95 controlling leaf senescence [13], responses to drought [14] and pathogen defense [15]. In  
96 grapevine, although not as central as in climacteric fruits like tomato (*Solanum*  
97 *lycopersicum*), the phytohormone ethylene is also involved in the control of berry ripening  
98 [1, 11, 16, 17]. Application studies on grapevine berries indicate that auxin has a negative  
99 effect on berry ripening in that it induces a delay of ripening [18, 19].

100 Fruit development of both, dry and fleshy fruits, has been studied very intensively for the  
101 obvious reason that fruits are central to human nutrition [20, 21]. The main model system  
102 for studies on fleshy fruits is tomato, because of established genetics and molecular biology,  
103 access to mutants, and well advanced transgenic approaches to gene function identification  
104 [22, 23]. Berry development of grapevines has also been studied intensively [1, 24] and often  
105 at the level of the transcriptome. In quite some of the studies, predominantly late berry  
106 development stages were sampled to put véraison into the focus [25-28]. In addition, whole  
107 berry development was studied with coarse time point distribution [29-33].

108 To monitor gene expression changes at a high resolution throughout grapevine berry  
109 development, starting from flowering until berries are matured, we sampled a  
110 comprehensive time series from two Pinot cultivars and in two years. The samples were

111 collected from the grapevine cultivar 'Pinot Noir' (PN) and the comparably earlier ripening  
112 cultivar 'Pinot Noir Precoce' (PNP) that is expected to be closely related to PN. The cultivar  
113 PNP is listed in the *Vitis* International Variety Catalogue (VIVC; [34]) and described to flower  
114 at the same time as PN but to reach véraison significantly earlier than PN [35]. Quantitative  
115 data for transcript levels, interpreted as values for gene expression, were generated by RNA-  
116 Seq. We studied the general course of gene expression patterns throughout berry  
117 development in both years and cultivars, and identified a number of differentially expressed  
118 genes (DGEs) between PN and PNP prior to véraison. These DEGs can be considered as  
119 important candidates for either delaying or pushing forward berry development. Our main  
120 aim was the identification of genes controlling the speed of development, to offer an entry  
121 point into characterization of the relevant molecular functions in grapevine, and to facilitate  
122 breeding in the future that addresses traits relevant to and affected by climate change.

123

## 124 **Results**

### 125 **Phenotypical comparison between two Pinot cultivars**

126 To study ripening shifts, we used samples of two closely related grapevine cultivars. The  
127 cultivar PNP is an earlier ripening clonal variant of its ancestor PN. Clonal relation of PN and  
128 PNP was confirmed by a set of 24 SSR markers that all displayed the identical allele status for  
129 both cultivars (Additional file 1: Table S1). To confirm and validate the phenotypic  
130 differences between PN and PNP, detailed BBCH developmental stages were determined  
131 and documented (Figure 1). PN and PNP display similar phenotypical properties during  
132 development and flower (BBCH65) at the same time. However, véraison (BBCH81) is shifted  
133 to about two weeks earlier for PNP and similar shifts were detected in four documented  
134 years (Table 1). In addition, Figure 1A shows an overview over the time points at which

135 samples were taken. For a visual documentation of the phenotypic differences between PN  
 136 and PNP, images of developing berries were taken between onset of berry formation and  
 137 véraison (Figure 1B and Additional file 1: Table S2 and Table S3). Again, véraison (BBCH81),  
 138 visible on the images as the begin of anthocyanin accumulation, is detected approximately  
 139 two weeks later in PN compared to PNP.  
 140

## A

### 2014:

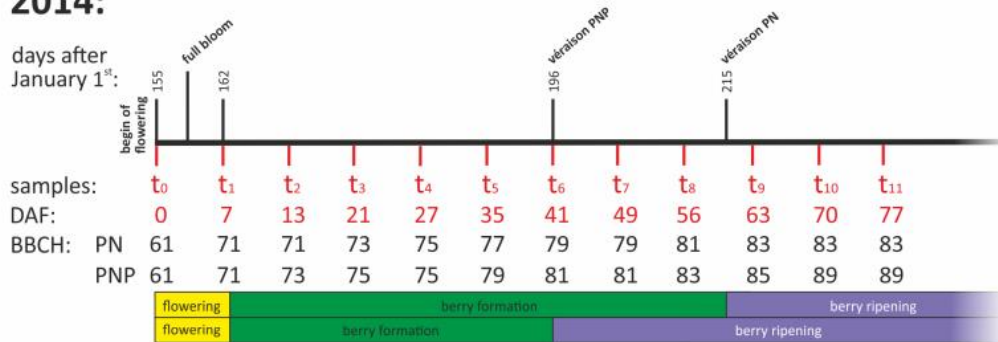

### 2017:

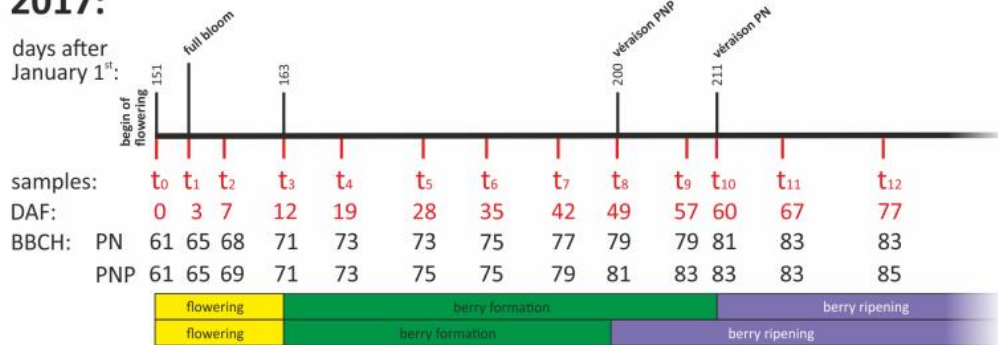

## B

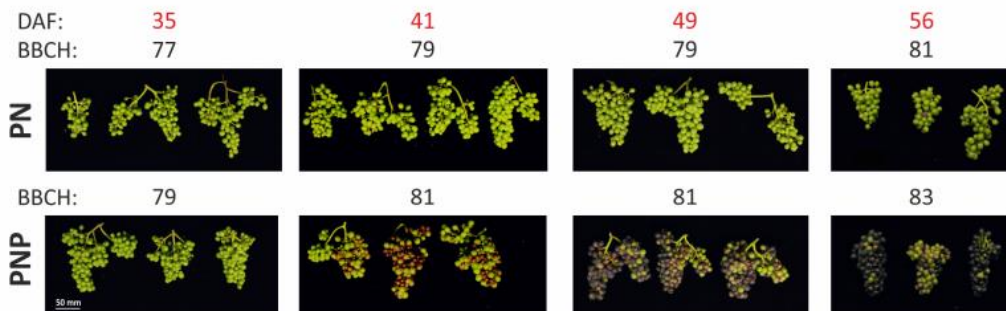

141

142 **Figure 1:** Phenotypical observations and sampling scheme. (A) Sampling time points and days  
 143 after begin of flowering (DAF) are indicated in red. The developmental stage observed is  
 144 shown in the BBCH stages [3, 4]. Berry development is depicted schematically and  
 145 categorized into the phases flowering (yellow), berry formation (green), and berry ripening  
 146 (purple) for both cultivars. The junction between green and purple indicates *véraison*  
 147 (BBCH81). As an orientation for time of the year, days after January 1<sup>st</sup> are shown for distinct  
 148 transitions of the phases. (B) Images of grape bunches and developing berries taken in 2014  
 149 to document the difference between PN and PNP. Images were taken 35, 41, 49 and 56 DAF.  
 150 Scale bar: 50 mm.

151

152 **Table 1:** Observed flowering- and berry development shifts between the cultivars PNP and  
 153 PN in 2014, 2015, 2016 and 2017 at the vineyards Geilweilerhof, Siebeldingen (in days after  
 154 January 1<sup>st</sup>).

| Year | Cultivar | Start of flowering (BBCH61) | End of flowering period / Start of berry formation (BBCH71) | End of berry formation / <i>véraison</i> (BBCH81) | Flowering time [ $\Delta$ days] | Berry formation time [ $\Delta$ days] |
|------|----------|-----------------------------|-------------------------------------------------------------|---------------------------------------------------|---------------------------------|---------------------------------------|
| 2014 | PNP      | 155                         | 162                                                         | 196                                               | 0                               | 19                                    |
| 2014 | PN       | 155                         | 162                                                         | 215                                               |                                 |                                       |
| 2015 | PNP      | 159                         | 166                                                         | 201                                               | 7                               | 14                                    |
| 2015 | PN       | 159                         | 173                                                         | 222                                               |                                 |                                       |
| 2016 | PNP      | 171                         | 180                                                         | 215                                               | 0                               | 14                                    |
| 2016 | PN       | 171                         | 180                                                         | 229                                               |                                 |                                       |
| 2017 | PNP      | 151                         | 163                                                         | 200                                               | 0                               | 11                                    |
| 2017 | PN       | 151                         | 163                                                         | 211                                               |                                 |                                       |

155

## 156 **Global view on gene expression patterns**

157 We harvested the samples in 2014 and 2017 (for time points see Figure 1 and Additional file  
 158 1 Tables S2 and S3) in triplicates (individual harvests are referred to below as subsamples)  
 159 and analyzed them by RNA-Seq. After preprocessing of the raw data (see Methods), the  
 160 reads derived from each subsample were mapped to the reference sequence from PN40024



161 and analyzed with respect to the CRIBI V2.1 annotation dataset. For 2014, approximately  
162 19.7 million reads per subsample were obtained from each of the 72 libraries. An overall  
163 alignment rate of 79 % to the grape reference genome sequence was reached. For 2017,  
164 approximately 43.5 million reads per subsample were obtained from each of the 78 libraries.  
165 From these, an overall alignment rate of 92 % to the reference was calculated. Expression  
166 values were initially detected as Transcripts Per Kilobase Million (TPM) and averaged over  
167 the three subsamples for each sample. Considering both years separately, a total of 28,692  
168 genes were detected as expressed in both cultivars and in both years. In contrast, 2,152  
169 CRIBI V2.1 genes were found not to be expressed.

170 The correlation between gene expression data, determined as TPM values per sample, of the  
171 datasets from both years over all genes was  $r = 0.5095$  (Pearson correlation coefficient) for  
172 PN and  $r = 0.6557$  for PNP, respectively. For PN and PNP, 10,205 and 16,226 genes,  
173 respectively, expression values were significantly correlated ( $p$ -value  $< 0.05$ ) between the  
174 years 2014 and 2017. A list of the correlation strength of the eight time points with the same  
175 BBCH stage is provided in Additional file 1: Table S4.

176 To visualize global trends and similarity of the gene expression values obtained from all  
177 subsamples, a Principal Component Analysis (PCA) of both years was performed with  
178 keeping the subsamples separate. The first component PC1 explains 57% of the variance,  
179 whilst the second component PC2 explains 17% (Figure 2). Almost all data points of the  
180 subsamples (triplicates within a sample) from both years cluster near to each other. The data  
181 follow a track of time in a nearly consecutive and continuous way. Main actors, which  
182 influence most of the variance in the data, were genes related to cell wall modification,  
183 secondary metabolism, wounding-response and hormone signaling. The top 500 genes  
184 describing most of the variance in PC1 and PC2 are listed in Additional file 1: Table S5 and

185 Table S6, together with functional information for each listed gene from MapMan/Mercator  
186 and RefSeq.

187

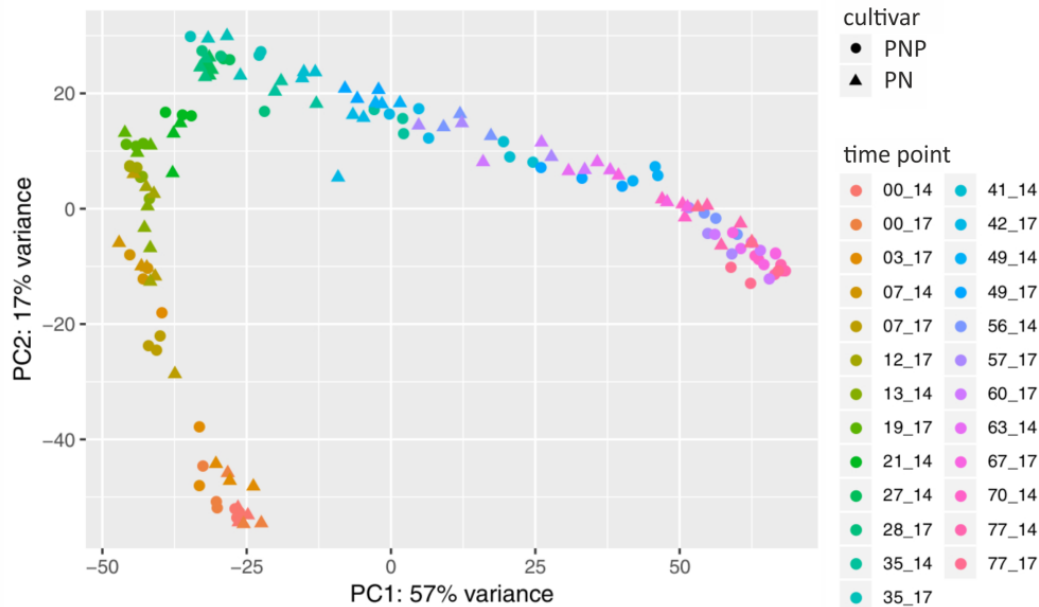

189 **Figure 2:** Principle component analysis of gene expression values from all subsamples. Each  
190 data point represents a single subsample of the triplicates for each time point of both years  
191 (2014 and 2017 as indicated by [DAF]\_14 and [DAF]\_17 with the color code) and for both  
192 cultivars (PN as triangles, PNP as circles).

193

#### 194 **Cluster analysis for identification of co-expressed genes**

195 The four gene expression time series profiles of all genes (two years, both cultivars,  
196 combined data from the subsamples/triplicates for each gene) were compared using the  
197 clustering tool clust. The goal was the characterization of the data with respect to similarity  
198 and/or differences among years and cultivars throughout berry development. Over all four  
199 datasets, 13 PN/PNP clusters of genes with similar gene expression patterns (C1-C13) were  
200 obtained (Additional file 2: Figure S1A). In these clusters, 3,316 (12.2 %) of the 27,139 genes  
201 expressed during berry development show co-expression among both years and cultivars

202 (note that clust uses criteria to define expressed and not expressed genes that differ from  
203 the ones applied above, see Methods). The observed expression profiles differ clearly  
204 between the clusters, which was in part the result of the restricted the number of clusters  
205 that clust extracts. Manual inspection of the clusters revealed little deviation of individual  
206 gene expression profiles within each individual cluster for a given year or cultivar. All cluster  
207 gene memberships, also those for the additional cultivar-specific cluster analyses (see  
208 below), are available in Additional file 1: Table S7-S9.

209 The PN/PNP clusters C2, C5, C6 and C12 (C12\_PN/PNP selected as example, see Figure 3)  
210 reveal a small but detectable difference in the gene expression profile between both  
211 sampled years, but are almost identical for both cultivars. Thus, the genes in these clusters  
212 may display dependence on environmental factors in their expression patterns, potentially  
213 due to differences in the weather conditions between the two years studied. The PN/PNP  
214 clusters C1, C7 and C11 (C1\_PN/PNP selected as example, see Figure 3) show similar  
215 expression profiles over the two years, but stand out by shifted expression peaks that  
216 distinguish PN and PNP.

217 To characterize the clusters with respect to potential functions of the co-expressed genes  
218 included in a given cluster, GO term enrichment for biological processes was calculated. The  
219 full list of enriched GO terms for all clusters is listed in Additional file 1: Table S10-S12. Two  
220 examples for GO terms showing up with highly significant incidence were 'response to  
221 oxidative stress' in cluster C11\_PN/PNP (term GO:0051276) and 'regulation of defense  
222 response' in cluster C5\_PN/PNP (term GO:0031347).

223 Two additional cluster analyses were performed, one for the PN data from both years  
224 (Additional file 2: Figure S1B) and one for the PNP data from both years (Additional file 2:  
225 Figure S1C). These analyses revealed a high abundance of genes from the expansin gene

226 family showing a similar expression profile in clusters C0\_PNP and C6\_PN. Moreover, the  
227 cluster C16\_PN showed a highly significant enrichment for 'vegetative to reproductive phase  
228 transition' (GO:0010228). Cluster gene memberships for the cultivar-specific clustering are  
229 available in Additional file 1: Table S8-9, and the corresponding GO term enrichment is  
230 summarized in Additional file 1: Table S11-12.  
231

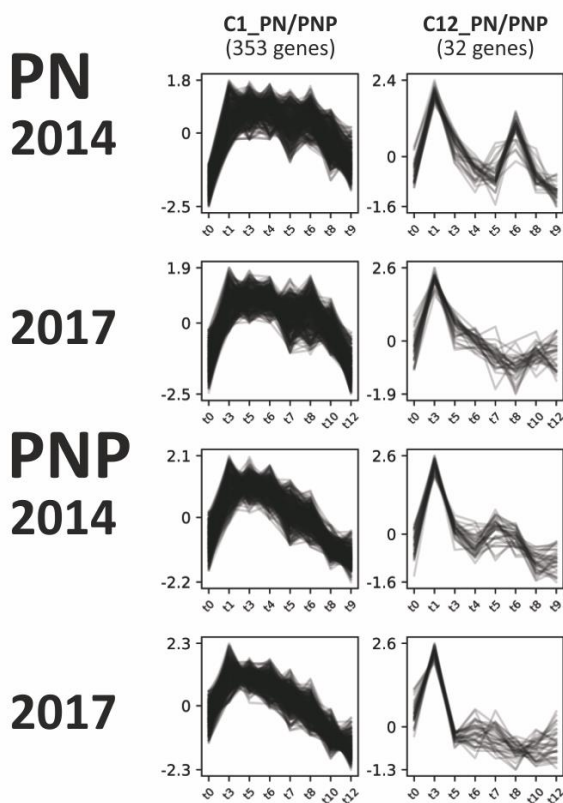

232  
233 **Figure 3:** Two selected gene expression profile clusters with either a cultivar-specific  
234 difference (C1\_PN/PNP) or a weather/field condition-specific difference (C12\_PN/PNP) after  
235 clustering all data (both cultivars and both years). Strength of gene expression (quantile  
236 normalization) was plotted over the time course of berry development. Sampling time points  
237 are detailed in Figure 1 and were restricted to those eight equivalent time points at which  
238 the cultivars display the same BBCH stage (Additional file 1: Table S4). For all PN/PNP  
239 clusters see Additional file 2: Figure S1A. IDs of genes that make up the clusters are listed in  
240 Additional file 1: Table S7.  
241

242 **Analyses of differentially expressed genes**

243 The gene expression time series throughout berry development were analyzed for  
 244 differentially expressed genes (DEGs) between the two cultivars PN and PNP with DESeq2.  
 245 Significantly differentially expressed genes were selected by using the filters adjusted p-  
 246 value (PADJ) < 0.05 and log2fold change (LFC) > 2. The results are summarized in (Table 2)  
 247 and are detailed at the gene level per time point compared in Additional file 1: Table S13.

248

249 **Table 2:** Filtering steps applied for selecting DEGs, and the number of DEGs that were carried  
 250 on after each selection step. For details see Methods.

|                                                                              | PN/PNP 2014 [DEGs] | PN/PNP 2017 [DEGs] |
|------------------------------------------------------------------------------|--------------------|--------------------|
| <b>adjusted p-value (PADJ) &lt; 0.05:</b><br>(counted over all sample pairs) | 8,206              | 4,419              |
| <b>log2fold change (LFC) &gt; 2:</b><br>(counted over all sample pairs)      | 6,629              | 4,298              |
| <b>down- / up-regulated</b><br>(in PNP vs. PN):                              | 3,293 / 3,336      | 2,130 / 2,168      |
| <b>unique:</b><br>(non-redundant within time series)                         | 3,342              | 2,745              |
| <b>intersection:</b><br>(detected in both years)                             | 1,923              |                    |
| <b>excluded due to intersection:</b>                                         | 1,419              | 822                |
| <b>véraison-specific genes:</b><br>(detected within BBCH79-81 of PNP)        | 388                |                    |
| <b>potentially regulatory:</b><br>(detected within BBCH61-79 of PNP)         | 12                 |                    |

251

252 In total, 8,206 and 4,419 DEGs were identified with PADJ better than 0.05 for 2014 and 2017,  
 253 respectively. Almost twice as many DEGs were initially detected for 2014 compared to 2017.  
 254 By applying the filter for an at least 2-fold difference in expression level (LFC > 2), the  
 255 number of significant DEGs decreased, mainly for the PN/PNP time series from 2014. In the

256 beginning of both time series, that is during flowering (BBCH61 to 69), only few DEGs  
257 between PN and PNP were observed (see Figure 4). Within berry formation (BBCH71 to 79),  
258 the number of DEGs detected increased towards véraison (BBCH81) as both genotypes  
259 increasingly vary for their physiological stage. The highest number of DEGs was observed in  
260 parallel to the time-shifted véraison of PNP relative to PN that phenotypically is the most  
261 prominent difference between the two cultivars. A set of véraison-specific genes was  
262 defined by selecting the DEGs from time points DAF35 and DAF41 from 2014 that show also  
263 up at DAF42 and DAF49 from 2017. These criteria identified 388 véraison-specific DEGs. This  
264 set of véraison-specific genes was compared to results from similar studies and matches very  
265 well (e.g. 81% [25] and 52% [26]; IDs of the 388 genes, the genes that match results from the  
266 other studies and their functional annotation are included in Additional file 1: Table S14).

267 During the subsequent phase of berry ripening (BBCH81 to 89), the number of DEGs  
268 detected decreases.

269 We developed a visualization for the numbers of DEGs detected and the changes with  
270 respect to which genes are newly appearing as differentially expressed at a given time point  
271 (sample pair PN/PNP) in the time series. Figure 4 shows this visualization. Groups of newly  
272 appearing DEGs relative to an earlier time point were indicated by a new color shade in the  
273 column (bar) for each time point. For members of a given group of DEGs, the attributed  
274 color shade was kept for the subsequent columns. This implies that DEGs are initially  
275 counted for a pair of PN/PNP samples for each time point individually. If DEGs appearing in  
276 several time points are counted only once, 3,342 and 2,745 unique DEGs (different genes)  
277 are detected from 2014 and 2017, respectively (compare Table 2).

278

## 2014 DEGs:

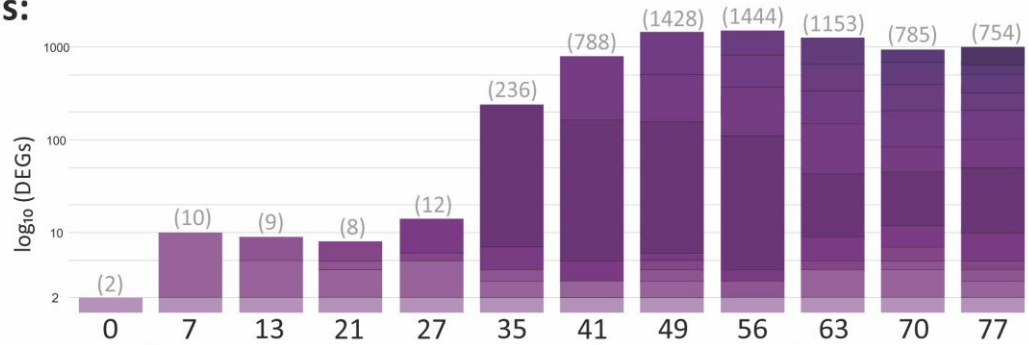

## 2017 DEGs:

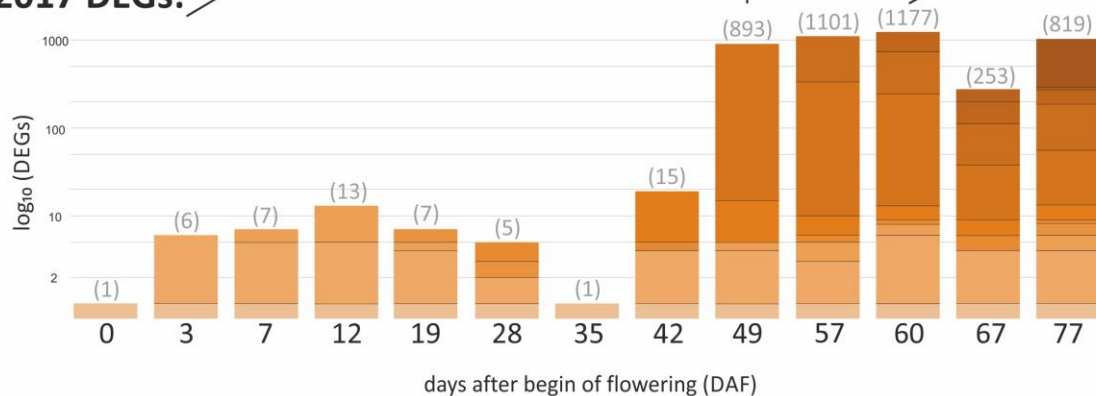

279

280 **Figure 4:** Visualization of the number of DEGs detected between PN and PNP in a logarithmic  
281 scale ( $\log_{10}$ ). Results for 2014 are shown in purple, those for 2017 in orange. The time series  
282 from the two years were aligned at véraison of PNP; the timeline is given as days after begin  
283 of flowering (DAF). The number above each column mentions the number of DEGs detected  
284 at the respective time point. Each color shade in each column represents newly appearing  
285 DEGs, i.e. those that were additionally detected compared to the earlier sample; the color  
286 shade is kept for this set of genes in the subsequent time points (columns/samples).

287

288 To further increase the reliability, reproducibility, and relevance of the selected DEGs, the  
289 intersection between the DEGs identified in the two years studied was build. In total, 1,923  
290 unique DEGs were obtained (Table 2). To reveal DEGs potentially involved in the regulation  
291 of ripening, i.e. genes that might be involved in the trait that mainly distinguishes PN and  
292 PNP, only intersecting DEGs which appeared at time points before véraison of PNP were  
293 picked. This resulted in a list of 12 putative ripening-regulatory DEGs. It should be noted that

294 these putative ripening-regulatory DEGs are supposed to be relevant before the set of  
295 véraison-specific genes implements the phenotypic changes at véraison. The full list of DEGs,  
296 their identity and annotation information as well as their fit to the selection criteria on the  
297 way from all (raw) DEGs to ripening-regulatory DEGs is detailed in Additional file 1: Table  
298 S13. IDs of the 12 putative ripening-regulatory genes, the genes that match results from  
299 related studies (7 DEGs [25], 4 DEGs [33] and 3 DEGs [26]) and their functional annotation  
300 are included in Additional file 1: Table S14.

301

### 302 **Functional classification of DEGs**

303 To complement the gene lists with functional information from grapevine that might  
304 potentially be informative for berry development, the 1,923 intersecting DEGs were  
305 analyzed with respect to enrichment of genes that have been assigned to biological  
306 pathways already established for grapevine (see Methods). For 46 of the 247 defined  
307 grapevine pathways, significant enrichment (permuted p-value <0.1) was detected. The most  
308 reliable predictions (permuted p-value <0.001) for pathways that might be relevant were  
309 photosynthesis antenna proteins (vv10196; 9 DEGs); nitrogen metabolism (vv10910, 19  
310 DEGs); phenylpropanoid biosynthesis (vv10940, 66 DEGs), tyrosine metabolism (vv10350, 33  
311 DEGs); transport electron carriers (vv50105, 18 DEGs); phenylalanine metabolism (vv10360,  
312 33 DEGs); brassinosteroid biosynthesis (vv10905, 8 DEGs) and flavonoid biosynthesis  
313 (vv10941, 30 DEGs). The enrichment results are provided in (Additional file 1: Table S15). The  
314 same analysis was also carried out for the 12 putative ripening-regulatory (Additional file 1:  
315 Table S16) and the 388 véraison-specific DEGs (Additional file 1: Table S17).  
316 A check of the 1,923 intersecting DEGs revealed that 141 TF genes are included. Of these, 48  
317 DEGs were clearly up- and 93 down-regulated at their first appearance in the time series.



318 The full list of TF encoding genes that were higher expressed in PNP (up-regulated), or lower  
319 expressed in PNP (down-regulated), compared to PN, is shown in Additional file 1: Table S18.  
320 For a more detailed view on the expression patterns of selected TF encoding genes, we  
321 generated for the TF gene family with the highest abundance among the 141 TF genes,  
322 namely the R2R3-MYB-type TFs with 22 cases in the MapMan functional assignment, an  
323 expression heatmap (Additional file 2: Figure S2). As a result, *VviMYB24*  
324 (VIT\_214s0066g01090), which is related to At3g27810/*AtMYB21*, At5g40350/*AtMYB24* and  
325 At3g01530/*AtMYB57* according to TAIR/PhyloGenes, was identified as an early appearing  
326 DEG that showed its highest expression level at flowering (BBCH61). Prominent *R2R3-MYB*  
327 genes known to be relevant for anthocyanin accumulation like *VviMYBA1*  
328 (VIT\_202s0033g00410), *VviMYBA2* (VIT\_202s0033g00390), *VviMYBA3*  
329 (VIT\_202s0033g00450) and *VviMYBA8* (VIT\_202s0033g00380) were detected as expressed  
330 starting from véraison (BBCH81) in both cultivars and with a time shift towards earlier  
331 expression in PNP. An additional *R2R3-MYB* gene with a similar expression pattern is  
332 *VviMYB15* (VIT\_205s0049g01020). Other *R2R3-MYB* genes are expressed early during berry  
333 formation, these include *VviMYBF1* (VIT\_207s0005g01210, related to  
334 At2g47460/*AtMYB12/AtPFG1*) as well as *VviMYBPA5* (VIT\_209s0002g01400) and *VviMYBPA7*  
335 (VIT\_204s0008g01800, both related to At5g35550/*AtMYB123/AtTT2*). According to their  
336 related expression patterns visualized in the heatmaps (Additional file 2: Figure S2), the  
337 *R2R3-MYB* genes fall into three groups that roughly fit to the three phases marked in Figure  
338 1B, namely flowering, berry formation, and berry ripening (see discussion).

339

340 **Putative candidates for ripening-regulatory genes**

341 As mentioned above, DEGs detected in both years at time points before véraison of PNP  
342 were selected and considered as putative ripening-regulatory genes (Table 2, see full list in  
343 Additional file 1: Table S13). The VitisNet enrichment analyses performed for these 12  
344 candidates resulted in 2 pathways that showed significant (permuted p-value < 0.05)  
345 enrichment with two genes in the pathway: auxin signaling (vv30003 with *VviEXPA5*  
346 (VIT\_206s0004g00070) and *VviEXPA14* (VIT\_213s0067g02930)) and cell wall (vv40006 with  
347 *VviPL1* (VIT\_205s0051g00590) and *VviGRIP28* (VIT\_216s0022g00960)); see Additional file 1:  
348 Table S16).

349 A detailed check of the data presented in Figure 4, together with results for the putatively  
350 ripening-regulatory DEGs, resulted in the identification of two DEGs that stand out from the  
351 whole list of DEGs. Both genes almost completely lack expression in the early ripening  
352 cultivar PNP while there is clear expression in PN. Therefore, these two genes were detected  
353 as DEGs throughout the whole time series in both years. The first of the two, designated  
354 *VviRTIC1* for "Ripening Time Control" (VIT\_210s0071g01145, encoding a protein similar to  
355 "protein of unknown function DUF789"), is expressed during flowering (BBCH61 - 65) and is  
356 more or less continuously down-regulated over time in PN (Figure 5A). The second of the  
357 two, designated *VviRTIC2* (VIT\_200s0366g00020, encoding a protein similar to "cysteine-rich  
358 receptor-like protein kinase"), displays expression in PN during berry formation as well as  
359 during berry ripening with a peak before véraison in 2017 (Figure 5B). The expression  
360 patterns of the 10 remaining DEGs of the putative ripening-regulatory gene set are shown in  
361 Additional file 2: Figure S3.

362

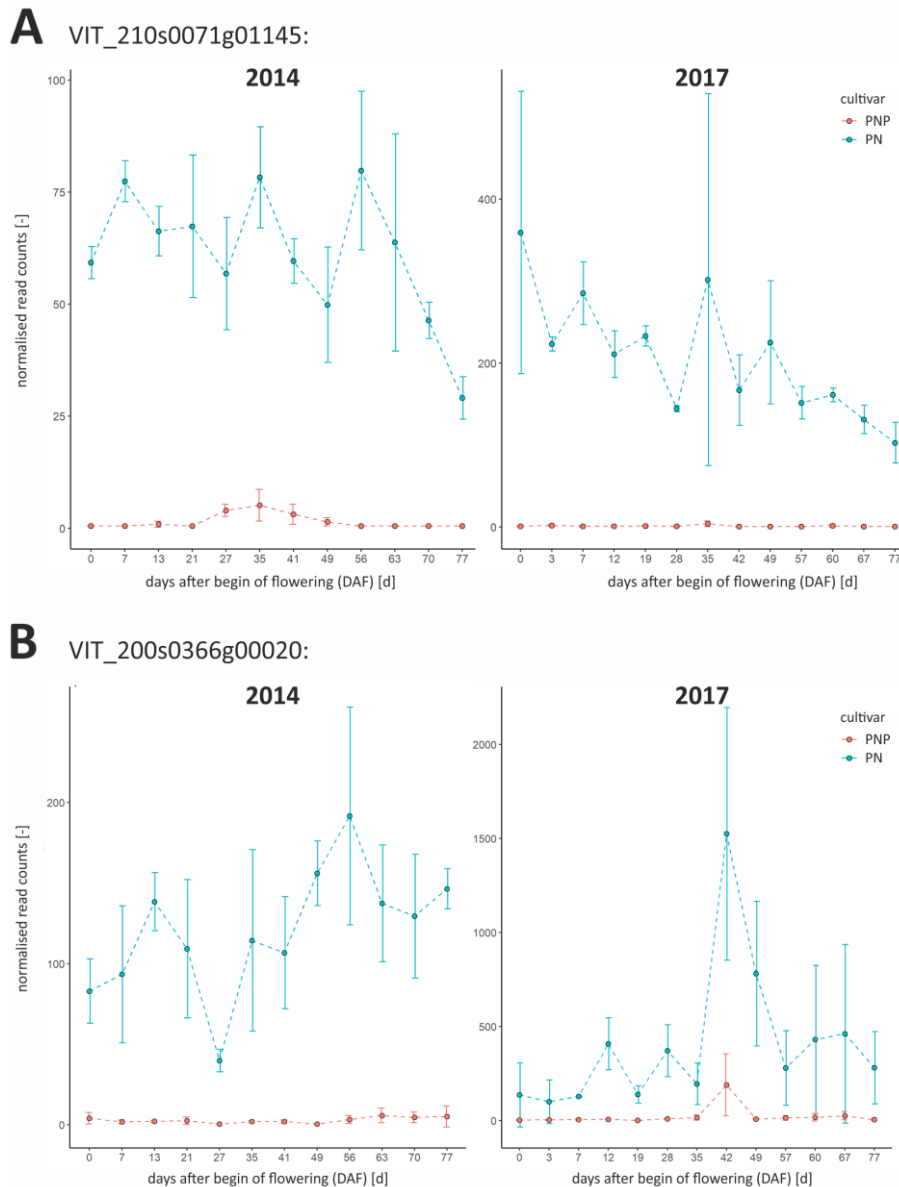

363

364 **Figure 5:** Expression patterns of *VvIRTIC1* (VIT\_210s0071g01145) in (A) and *VvIRTIC2*  
365 (VIT\_200s0366g00020) in (B) from RNA-Seq data of PN (blue) and PNP (red). Error bars  
366 display the standard deviation of triplicates. Left, expression profile from 2014. Right,  
367 expression profile from 2017. The y-axis represents the read counts from the output of  
368 DESeq2. The x-axis represents the development stages in days after begin of flowering (DAF).

369

## 370 Discussion

371 One of the first detectable mentions of the cultivar 'Pinot Precoce' in connection with the  
372 synonym '(German) Früh Burgunder Traube' (PNP) is in the French book "Ampelographie  
373 retrospective" [36]. We have confirmed the clonal relationship of PN and PNP by 24

374 genomically well distributed SSR markers. Although this does not prove that PN is the  
375 ancestor, it is very likely that PNP was derived from the cultivar PN by somatic mutation [35].  
376 We used these two isogenic cultivars, that are distinguished by a clear phenotype regarding  
377 the duration of berry formation, to analyze changes in gene expression throughout berry  
378 development. The aim was to identify candidates for genes controlling the speed of berry  
379 development and the timing of véraison. Samples from inflorescences as well as from  
380 forming and ripening berries were collected from the begin of flowering until after véraison  
381 of PN and PNP in 2014 and 2017. These samples were subjected to RNA-Seq analyses in two  
382 dense time series.

383

#### 384 **Phenotypic differences between the cultivars PN and PNP**

385 The data from 4 years of careful assessment of the BBCH developmental stages of PN and  
386 PNP at the same location validate earlier observations from viticulture [35] that lead to  
387 establishment of PNP as a distinct grapevine cultivar in north European wine growing  
388 countries. Berry formation lasts about two weeks less in PNP, is clearly accelerated  
389 compared to PN and results in PNP entering véraison approximately two weeks earlier than  
390 PN (Figure 1A, Table 1). It is reasonable to assume that this acceleration affects berry  
391 formation throughout, i.e. from immediately after fruit set until véraison. Functionally, this  
392 hypothesis implies that the genes that are responsible for the control of timing of berry  
393 development and for the establishment of the phenotypic difference between PN and PNP  
394 should be acting already very early in berry development, starting at least shortly after  
395 flowering and at or even before BBCH61 to BBCH79. At the end of ripening (harvest), the  
396 berries of PNP reach high sugar content earlier within the season when compared to PN.

397

### 398 **General validation of the RNA-Seq dataset**

399 To estimate overall data quality, the expression profiles obtained from PN and PNP were  
400 correlated for the two sampled years 2014 and 2017. Pearson correlation was moderate, but  
401 this is expected considering the conditions of the free field environment. Exposure of the  
402 vines to external factors like biotic or abiotic stressors, including weather conditions that  
403 differ significantly between the years, also affect the transcriptome which reduces the level  
404 of correlation [37]. In a PCA, almost all datapoints lie on the same intended track, and  
405 biological replicates (subsamples) from both years are located close to each other. The main  
406 actors, which predominantly influence the variance in the dataset, are genes related to cell  
407 wall modification, secondary metabolism, wounding and hormone signaling. These gene  
408 categories fit the expectation since berry development is known to be controlled by  
409 hormones, requires new cell walls, and is accompanied by accumulation of  
410 secondary/specialized metabolites [22, 24]. These initial results validated the quality of the  
411 dataset and indicated clearly that sampling of biologically closely related material for the  
412 subsamples/triplicates was successful.

413

### 414 **Co-expression analysis shows similar gene expression clusters between cultivars and years**

415 To further validate the data with respect to comparability as well as reproducibility between  
416 the two years, related gene expression profiles were identified among all genes by clustering  
417 the data from the four different time series. Generally, clusters of the same genes with  
418 similar expression patterns over time were observed for both cultivars and both years. Also,  
419 the cluster analyses for gene expression patterns among the years 2014 & 2017 in only PN  
420 and in only PNP, confirmed comparability of the gene expression patterns obtained in these  
421 two years. Detailed inspection revealed clusters representing expression profiles (and

422 clusters of genes) with and without an environmental influence. Especially the cultivar-  
423 specific clusters C1\_PN/PNP, C7\_PN/PNP and C11\_PN/PNP stand out. Comparison of the  
424 expression profiles for PN to those of PNP in these clusters identified a similar pattern that is  
425 moved to a different time in PNP. These findings are congruent with the shifted ripening  
426 time phenology of the two cultivars, namely accelerated berry formation in PNP by about  
427 two weeks. In contrast, the clusters C2\_PN/PNP, C5\_PN/PNP, C6\_PN/PNP and C12\_PN/PNP  
428 display more pattern similarity among the two years than among the two cultivars which  
429 indicates environmental control of the expression of the genes in these clusters. Strong  
430 environmental effects on gene expression patterns have also been described for grapevine  
431 berry development at 11 different environments (vineyards) from northern Italy [38]. By  
432 approximation, highly similar expression profiles are summarized in the PN/PNP clusters C3,  
433 C4, C7, C8, C9 and C10. The genes included in these clusters are probably less affected by  
434 environmental factors and/or the genotypic difference between PN and PNP. We conclude  
435 that our RNA-Seq results and expression level comparisons between two years are based on  
436 valid data.

437 When the genomic location of the DEGs is analyzed, a genome region on chromosome 16  
438 comes into focus. In this region, 54 of the DEGs from the set of 1,923 intersecting DEGs  
439 (Table 2) are located. Of these, 28 encode stilbene synthases [39] that are all up-regulated  
440 after véraison of PNP (BBCH83). This genome region fits to a major QTL (Ver1) for "timing of  
441 the onset of véraison" on linkage group 16 [40]. It remains to be determined if this  
442 aggregation of DEGs is by chance. Potentially, the observation is biased by co-regulation of a  
443 large number of closely linked stilbene synthase genes.

444

445 **Differentially expressed genes throughout berry development and identification of**  
446 **véraison-specific genes**

447 Differential gene expression analysis and subsequent filtering revealed 1,923 DEGs between  
448 PNP and PN. DEG detection was based on a comparison of samples taken from the two  
449 cultivars at very similar DAF. As expected for the characterized phenotype, PNP reaches  
450 véraison when PN is still in the phase of berry formation. Consequently, the strong increase  
451 in the number of detected DEGs shortly before and at véraison of PNP results from the  
452 different developmental stage of PNP compared to the lagging PN. Subsequently, when also  
453 PN enters véraison, the number of DEGs declines (note that Figure 4 uses a logarithmic  
454 scale). A list of 388 genes that show up in both years with a véraison-specific expression  
455 pattern was extracted and compared to published results. Interestingly, about 81.5% of the  
456 388 PN/PNP véraison-specific genes were also described in the 4,351 differentially expressed  
457 genes between the table grape cultivar '8612-CTR' (wild type) and its early ripening bud  
458 mutation '8612-ERN' [25]. Also, analyses of berries from the cultivars 'Cabernet Sauvignon'  
459 and 'Pinot Noir' by RNA-Seq identified a gene set of 5,404 genes marking the onset of berry  
460 ripening [26]. This set covers 51.5% of the 388 PN/PNP véraison-specific genes (Additional  
461 file 1: Table S14). Further, several "switch genes" which are supposed to encode key  
462 regulators of the developmental transition at véraison [33, 41] are included in the 388  
463 véraison-specific gene set (Additional file 1: Table S14). We conclude that the PN/PNP  
464 véraison-specific set of 388 genes represents a core set of genes that are relevant for  
465 executing the switch from berry formation to berry ripening. The fact that a relatively small  
466 gene set was detected that still displays high overlap to studies that addressed a similar  
467 biological question indicates that the specific experimental setup implemented filters acting  
468 well against unrelated genes. The comparison of "wildtype to mutant" results in isogenic

469 background, growth in the same vineyard/location reduced environmentally controlled  
470 transcriptome differences, and dense sampling together with high RNA-Seq read coverage  
471 allowed good resolution power.

472 In order to check for potentially co-expressed genes within the véraison-specific gene set,  
473 the memberships for these genes in the PN/PNP cluster analysis were investigated. A total of  
474 48 véraison-specific DEGs were detected in cluster C6\_PN/PNP (contains 914 genes). These  
475 48 genes include several prominent ripening-related genes like *VviGRIP61*  
476 (*VIT\_201s0011g05110*), *VviMYBA8*, *VviMRIP1* (*VIT\_205s0049g00760*, [42]), *VviGRIP4*  
477 (*VIT\_205s0049g00520*) and *VviGRIP28*. The about 20 *VviGRIP* genes were initially detected  
478 by differential cDNA screening as ripening-induced genes in grape [43]. Another relevant  
479 cluster is C5\_PN/PNP (contains 263 genes) which includes 37 of the 388 véraison-specific  
480 DEGs. Among these are *VviMYBA1*, *VviMYBA2*, *VviMYB15* and *VviGRIP22*  
481 (*VIT\_206s0004g02560*). The two clusters C5\_PN/PNP and C6\_PN/PNP show quite similar  
482 patterns (Additional file 2: Figure S1A). At first glance it is not obvious which difference has  
483 forced clust to put a given gene in either C5\_PN/PNP or C6\_PN/PNP. A comparison of the  
484 expression patterns of *VviMYBA2* (in C5\_PN/PNP) and *VviMYBA8* (in C6\_PN/PNP; see  
485 Additional file 2: Figure S2 for a heatmap) shows that there are borderline cases regarding  
486 assignment to either C5\_PN/PNP or C6\_PN/PNP.

487 In total, 22 genes encoding R2R3-MYB TFs were found among the 1,923 intersecting DEGs.  
488 Based on the timing of expression in PN and PNP, the 22 *R2R3-MYB* genes can be classified  
489 into three groups (Additional file 2: Figure S2). The first group is represented by *VviMYB24*  
490 which is expressed during early flowering (BBCH61) but switched off already at the transition  
491 from flowering to berry formation (BBCH71). *VviMYB24* is potentially orthologous to a group  
492 of three *A. thaliana* *R2R3-MYB* genes (*AtMYB21/24/57*) that are expressed in flowers and



493 function redundantly to regulate stamen development in the context of jasmonate action  
494 [44]. It is tempting to speculate that *VviMYB24* has a similar function in grape.  
495 The second group covers about 15 *R2R3-MYB* genes that are expressed during berry  
496 formation and pre-véraison (BBCH71 to 77). This group includes *VviMYBF1* which regulates  
497 flavonol biosynthesis [45], and *VviMYBPA5* as well as *VviMYBPA7* which belong to the clade  
498 of *AtTT2*-related genes that control proanthocyanidin (PA, flavan-3-ol) biosynthesis [7, 46,  
499 47]. The other *R2R3-MYB* genes in this group are less well characterized although there are  
500 functions described for some of them, e.g. *VviMYBC2-L3* (VIT\_214s0006g01620) as repressor  
501 of specific branches of the phenylpropanoid pathway [48].  
502 The third group of *R2R3-MYB* genes is active starting at véraison (after BBCH81) and covers  
503 about six genes. Among them are the anthocyanin accumulation controlling genes,  
504 *VviMYBA1*, *VviMYBA2*, *VviMYBA3* and *VviMYBA8* for which there is good evidence that they  
505 trigger anthocyanin biosynthesis [49]. Since PN and PNP are red berry cultivars, activity of  
506 the TF genes that direct anthocyanin accumulation is expected. In addition, this group  
507 includes *VviMYB14* and *VviMYB15* that are supposed to regulate the stilbene biosynthetic  
508 pathway [50]. With regard to the heatmaps (Additional file 2: Figure S2) and the analyses of  
509 the DEGs in this study in general, it should be noted that while the resolution within the  
510 developmental program and time is quite good, our data do not resolve the exact location of  
511 gene expression. Therefore, it remains to be determined if the expression detected is  
512 derived from berry skin, flesh, the seed or other tissues/cells.

513

#### 514 **Putative ripening-regulatory genes acting early in berry development**

515 To focus on genes that are contributing to the acceleration of berry formation in PNP, and/or  
516 to the control of timing of véraison, we selected DEGs detected at time points prior to

517 véraison of PNP (Table 2, Figure 4). This resulted in a set of only 12 genes that are potentially  
518 involved in the regulation of ripening time. According to our hypothesis that the genes  
519 relevant for acceleration of berry formation in PNP, which cause the earlier begin of ripening  
520 of PNP, should be acting from at least shortly after flowering, we designated this set of genes  
521 as "ripening-regulatory". However, genes that encode components of the respective  
522 regulatory networks and target genes of regulators including secondarily affected DEGs are  
523 surely included as well [51]. The 12 ripening-regulatory genes, i.e. the DEGs detected before  
524 véraison of PNP, encode proteins related to auxin action, pectin processing enzymes related  
525 to cell wall modification, TFs from the HD-Zip as well as NF-Y/LEC families, a cysteine-rich  
526 receptor-like protein kinase, an oleosin, and proteins with domains of unknown function.  
527 The two genes assigned to auxin signaling by VitisNet (vv30003) encode expansins (*VviEXPA5*  
528 and *VviEXPA14*, [52]). Expansins are known to be involved in fruit ripening through cell wall  
529 expansion and cell enlargement [53]. Auxin can delay the onset of véraison and ripening  
530 processes in grapevine [17-19]. Since reduced expression of genes from the auxin signaling  
531 pathway may indicate reduced auxin action due to lower auxin levels, the accelerated entry  
532 of PNP into véraison might be initiated by reduced auxin levels. Additionally, the genes  
533 *VviPL1* (pectate lyase 1 [54]), *VviPME10* (pectin methylesterase 10, VIT\_206s0009g02560)  
534 *VviGRIP28* (encoding a pectin methylesterase inhibitor precursor-like protein) are also  
535 related to cell wall processes, indicating that cell wall modification is an important target  
536 process also prior to véraison [53]. The gene *VviGRIP28* was also detected within a véraison-  
537 specific meta-QTL designated ver/ph16.1 [28]. It remains to be determined if this correlation  
538 has a functional basis.

539 The two genes in the set of 12 that encode TFs are *VviHDZ28* (VIT\_216s0098g01170, [55])  
540 and *VviLEC1* (VIT\_200s0956g00020, [56]). The *V. vinifera* gene VIT\_216s0098g01170 that has

541 been designated *VviHDZ28* has also been considered as a homolog of *AtHB12* (At3g61890),  
542 but it seems that *VviHDZ07* (VIT\_202s0025g02590) and *VviHDZ27* (VIT\_215s0048g02870) are  
543 more similar to *AtHB12*. In these cases, which lack clearly assignable homologs, transfer of  
544 functional information reaches its limits and might be restricted to concluding that *VviHDZ28*  
545 is important for organ development in *Vitis*. The gene *VviLEC1* is one of three genes in *V.*  
546 *vinifera* which are homologs of *AtLEC1* (At1g21970, NF-YB9) and *AtL1L* (LEC1-like,  
547 At1g21970, NF-YB6). LEC1 and L1L are central regulators of embryo and endosperm  
548 development. They are controlling, among other processes, embryo morphogenesis and  
549 accumulation of storage reserve [57]. It is tempting to speculate that the reason for the  
550 detection of *VviLEC1* among the 12 ripening-regulatory genes is that also seed development  
551 needs to be accelerated in PNP compared to PN. This would explain earlier and higher  
552 expression of *VviLEC1* in PNP compared to PN as observed (Additional file 2: Figure S3G).  
553 Consequently, *VviOLE5* (VIT\_216s0013g00880, encoding an oleosin involved in oil body  
554 formation [58]) would fit into the picture as relevant for lipid storage during seed  
555 development. According to the proposed enzyme function as alcohol acyltransferase of the  
556 protein encoded by VIT\_209s0018g01490 involved in volatile ester formation [59], this gene  
557 could fit in a similar way. For the gene VIT\_205s0077g01980 no functional annotation is  
558 available (uncharacterized protein), although homologs exist throughout the Magnoliophyta.  
559

#### 560 **Candidates for causal genes explaining the difference between PN and PNP**

561 Among the 12 putative ripening-regulatory genes, of which 10 are discussed above, two are  
562 especially interesting. Detailed analyses of the full set of DEGs, visualized in Figure 4,  
563 resulted in the identification of *VviRTIC1* and *VviRTIC2*, that could possibly be centrally  
564 involved in the accelerated berry development and earlier beginning of ripening in PNP

565 compared to PN. The special feature of the expression patters of the two genes (Figure 5) is  
566 that both are differentially expressed already at the first time point analyzed which was  
567 selected to hit the BBCH stage 61 (flowering before full bloom). Also, both genes are only  
568 barely expressed in PNP in both years studied, while expression in PN is high at almost all  
569 time points. *VviRTIC1* is annotated to encode a protein containing a domain of unknown  
570 function (DUF789), while *VviRTIC2* is annotated to encode a "cysteine-rich receptor-like  
571 protein kinase". The best blastP hit to *A. thaliana* protein sequences indicates that it is  
572 related to At4g23180/AtCRK10, but a closer inspection shows that similarity to  
573 At4g05200/AtCRK25, At4g23160/AtCRK8 and At4g23140/AtCRK6 is almost as high. This  
574 ambiguity, and also the fact that the *V. vinifera* genome contains several genes related to  
575 *VviRTIC2* (e.g. VIT\_210s0071g01200, VIT\_202s0087g01020 or VIT\_203s0017g01550 as listed  
576 by PhyloGenes), complicates transfer of functional information. For *AtCRK10*, relevance in  
577 cytokinin signaling has been provided by a systematic analysis of the *A. thaliana* CRKs [60].  
578 As pointed out above, it is well possible that the genes we have identified are part of a  
579 genetic pathway that realizes control of timing of berry development in *V. vinifera*, but that  
580 we have not reached the start of this pathway. The relevance of these two candidate genes  
581 in the causal genetic difference between PN and PNP remains to be determined. Phase-  
582 separated genome sequences of the cultivars will be required to resolve the genome  
583 structure of both alleles of *VviRTIC1 and 2* the genes in PN and PNP for an informative  
584 comparison. In future studies, we will address this question, for example by long read DNA  
585 sequencing.

586

587 **Conclusions**

588 This study detected 1,923 DEGs between the Pinot cultivars PN and PNP. The two clonal  
589 cultivars display a phenotypic difference, namely acceleration of berry development from  
590 full bloom to véraison in PNP. We defined 388 DEGs as véraison-specific and 12 DEGs as  
591 ripening-regulatory. The relatively small number of véraison-specific genes displays a very  
592 high overlap with results published for similar studies (see Additional file 1: Table S14) and  
593 could be used for studying a phytohormone network that is similarly realized in PN and PNP,  
594 but accelerated by about two weeks in PNP. Additionally, the ripening-regulatory gene set  
595 might offer access to a set of genes putatively important for triggering or delaying the start  
596 of berry ripening within PNP or PN, respectively. Further investigations are needed on the  
597 DNA sequence level to elucidate structural differences in the genomes, the function of the  
598 observed DEGs and their role in shifting ripening time in grapevine.  
599

## 600 **Material and Methods**

### 601 **Plant material and analysis of clonal relation**

602 The grapevine (*Vitis vinifera* subsp. *vinifera* L.) cultivar PNP (Pinot Precoce Noir, VIVC No.  
603 9280) is early ripening and has been described to be related to the cultivar PN (Pinot Noir,  
604 VIVC No. 9279) [34] that ripens later than PNP. To prove the clonal relation, DNA from both  
605 cultivars was genotyped utilizing 24 polymorphic SSR markers (VVS2, VVMD7, VVMD5,  
606 VVMD32, VVMD28, VVMD27, VVMD25, VVMD24, VVMD21, VVIV67, VVIV37, VVIQ52,  
607 VVIP60, VVIP31, VVIN73, VVIN16, VVIH54, VVIB01, VrZAG83, VrZAG79, VRZAG67, VrZAG62,  
608 VMC4F3.1, VMC1B11) as described [61]. The two cultivars used have been identified as  
609 accession DEU098\_VIVC9280\_Pinot\_Precoce\_Noir\_DEU098-2008-076 and  
610 DEU098\_VIVC9279\_Pinot\_Noir\_DEU098-2008-075, respectively. The tissue used for harvest  
611 is indicated below and in Figure 1. Both cultivars do not belong to an endangered species  
612 and were obtained and are grown in accordance with German legislation.

613

### 614 **Phenotypical characterization and sampling of plant material**

615 Plant material was harvested from PN and PNP grapevines trained in trellis. The plants are  
616 growing at the vineyards of JKI Geilweilerhof located at Siebeldingen, Germany (N  
617 49°21.747, E 8°04.678). The grapevine plants were planted with an interrow distance of 2.0  
618 m and spacing of 1.0 m in north-south direction. Inflorescences, developing and ripening  
619 berry samples of PNP and PN for RNA extraction were collected in two years with three  
620 independent biological replicates (subsamples) each. Sampling took place at systematic time  
621 points (12 time points in 2014, 13 time points in 2017), and at approx. 8 a.m. each day. In  
622 2014, harvesting took place regularly every 7 days with only two exceptions (one day  
623 deviation, DAF 13 and DAF 27). In 2017, harvesting was adapted to BBCH stages (Figure 1A).

624 The timeline in both years is described as days after begin of flowering (DAF), with begin of  
625 flowering defined as the day at which 10% of the individual flowers have lost their caps [3].  
626 For each subsample within the triplicates, material from two neighboring grapevines was  
627 selected. Grapevine plants were weekly phenotyped according to BBCH stage [3, 4].  
628 Phenotyping was performed repeatedly to ensure sampling from vines of the same  
629 development stage (e.g. percentage of open flowers during flowering, or berry development  
630 stage) to reach uniform subsamples. The phenotypical observations were summarized in  
631 Additional file 1 - Table S2 and S3. From these, the durations of flowering, berry formation  
632 and berry ripening as well as the resulting shifts between the cultivars were calculated  
633 (Table 1). Furthermore, images from berry developmental stages of both cultivars were  
634 taken in 2014 for 35, 41, 49 and 56 DAF. The sampled material was directly frozen in liquid  
635 nitrogen and stored at -70°C until RNA extraction.

636

### 637 **RNA extraction and cDNA library construction**

638 Biological replicates, i.e. the subsamples, were ground separately under liquid nitrogen.  
639 Total RNA was extracted using an RNA Isolation Kit (Sigma-Aldrich Spectrum™ Plant Total  
640 RNA) according to suppliers' instructions. For RNA-Seq, 500 ng total RNA per subsample  
641 were used to prepare sequencing libraries according to the Illumina TruSeq RNA Sample  
642 Preparation v2 Guide. For subsamples from 2014 and 2017, 72 and 78 libraries were  
643 constructed and sequenced, respectively. Enrichment of poly-A containing mRNA was  
644 performed twice, using poly-T oligos attached to magnetic beads included in the Illumina kit.  
645 During the second elution of the poly-A+ RNA, the RNA was fragmented and primed for  
646 cDNA synthesis. After cDNA synthesis, the fragments were end-repaired and A-tailing was  
647 performed. Multiple indexing adapters were ligated to the ends of the cDNA fragments and

648 the adapter ligated fragments were enriched by 10 cycles of PCR. After quality check and  
649 quantification, the libraries were pooled equimolarly.

650

### 651 **RNA-Seq**

652 Single end (SE) sequencing of the pooled barcoded libraries from 2014 was performed on an  
653 Illumina HiSeq1500 in HighOutput mode generating 100 nt reads. For samples from 2017,  
654 sequencing was done using an Illumina NextSeq500 generating 83 nt SE reads; two runs  
655 were performed with the same pool of barcoded libraries from 2017.

656

### 657 **Processing of RNA-Seq read data**

658 Raw reads were trimmed with Trimmomatic (version 0.36) [62]. For raw reads from the year  
659 2014, the following settings were used: LEADING:10 TRAILING:10 SLIDINGWINDOW:4:15  
660 MINLEN:50. In addition, a collection of all available Illumina adapter sequences was supplied  
661 to remove matches within the parameter 2:30:10. For raw reads from the year 2017,  
662 trimming settings were set to LEADING:6 TRAILING:6 SLIDING WINDOW:4:15 MINLEN:36. All  
663 trimmed reads were quality-checked via FastQC (version 0.11.8) [63]. Thus, possible adapter  
664 sequences and low-quality bases were removed. All trimmed reads passing QC were mapped  
665 to the reference genome sequence PN40024 (version 12Xv2) [64] using the graph-based  
666 alignment tool HISAT2 (version 2.1.0) [65, 66] with no additional soft clipping. Afterwards, all  
667 tagged genes (structural gene annotation: CRIBI v2.1) were counted with Featurecounts  
668 (Bioconductor package Rsubread version 3.8 [67]). To estimate transcript abundance as a  
669 measure for gene expression, counts for Transcripts Per Kilobase Million (TPM, [68]) were  
670 determined.

671



672 **Basic gene expression analyses**

673 TPM counts from the various samples were used for manual gene expression inspection, for  
674 determination of the number of expressed and not expressed genes, and to calculate the  
675 correlation between gene expression values from both years. Genes with a TPM value > 0  
676 added up over all samples from one year were classified as expressed, conversely genes with  
677 a TPM value = 0 added up over all samples as not expressed. A custom python script was  
678 applied utilizing the function `pearsonr` from SciPy python package (v. 1.2.3) [69], which  
679 calculates the Pearson correlation coefficient and the p-value for all year-to-year  
680 comparisons. Expression data pairs for TPM counts per gene from both sampled years,  
681 averaged over the three subsamples of each sample, were used. To test correlations and  
682 relationships between expression values from the two years, where samples were harvested  
683 with slightly different sampling patterns (see Figure 1A), eight equivalent time points with  
684 the same BBCH stages between the cultivars of each year were selected (see Additional file  
685 1: Table S4).

686

687 **Principal component analysis**

688 To explore data similarity, a Principal Component Analysis (PCA) was calculated over all gene  
689 expression values from both years and cultivars for all subsamples. All data points were  
690 normalized using variance stabilizing transformation function 'vst' from the R package  
691 DESeq2 (v. 1.12.4) [70]. Subsequently, the principal components were generated using  
692 'prcomp' from the R package 'stats' (v. 3.5.2) [71]. The resulting PCA object, displaying the  
693 main components PC1 and PC2, was plotted and exported. Additionally, genes with the  
694 highest variance contribution to PC1 and PC2 were extracted separately.

695

## 696 **Functional annotation of genes**

697 Transfer of annotation information from other plant species, mainly *A. thaliana*, was  
698 calculated using MapMan's sequence annotation tool Mercator (v. 3.6) [72, 73]. Additionally,  
699 all open reading frame (CDS from *V. vinifera*/grapevine genes) sequences were aligned to  
700 the non-redundant protein sequence data base RefSeq [74] with the basic local alignment  
701 tool for proteins BLASTp [75] (e-value  $\leq 0.001$ ). Short descriptions of gene functions were  
702 extracted and added to the gene lists in Additional file 1: Table S5, S6, S13, S14.  
703 GO term enrichment for biological processes was calculated via the R package 'topGO' (v.  
704 2.38.1) [76]. Subsequently, statistical reliability was calculated using Fishers exact test. All  
705 Gene IDs and their corresponding GO terms were extracted from the CRIBI database  
706 ([http://genomes.cribi.unipd.it/DATA/V2/annotation/bl2go.annot\\_with\\_GO\\_description.txt](http://genomes.cribi.unipd.it/DATA/V2/annotation/bl2go.annot_with_GO_description.txt)).  
707 All results of the GO term enrichment are deposited in Additional file 1 - Table S10-12.

708

## 709 **Cluster analysis**

710 To reveal co-expressed genes over all four datasets, the tool clust (v. 1.10.8) was used with  
711 default parameters [77]. As input, raw read counts from eight time points were used. These  
712 time points were selected to cover the same BBCH stages of PN and PNP from the years  
713 2014 and 2017 (Additional file 1: Table S4). First, all data were pre-processed as described in  
714 the clust manual. Values from corresponding subsamples (triplicates) were combined and  
715 averaged. To filter out uninformative (very low) gene expression values, an additional filter  
716 was applied: genes not reaching a sample expression value  $> 1$  in at least three conditions  
717 and in at least one cultivar from one year were discarded (-fil-v 1 -fil-c 3 -fil-d 1). Afterwards,  
718 the data were quantile normalized according to the RNA-Seq defaults of clust. Genes  
719 showing a flat expression profile were filtered out by applying the default settings [77].

720

## 721 **Differential gene expression analyses**

722 For analyses of differentially expressed genes, DESeq2 (v. 1.12.4; R Bioconductor) was  
723 employed. To test if gene expression differs significantly between two samples, the  
724 likelihood ratio test nbinomLRT, included in the DESeq2 package, was used. Normalization  
725 factors and dispersion estimates were used as described [70]. The output table contained all  
726 differentially expressed genes (DEGs) and the corresponding values for baseMean,  
727 log2FoldChange (LFC), lfcSE (LFC standard error), stat (difference in deviation between the  
728 reduced model and the full model), p-value and PADI (adjusted p-value). To focus on  
729 significantly differentially expressed genes from the DESeq2 analyses, cut-off filters  $PADI \leq$   
730 0.05 and  $LFC > 2$  were applied.

731

## 732 **Selection of gene sets potentially relevant for ripening and comparison with literature data**

733 In order to identify gene sets from the DEGs relevant for control and realisation of ripening,  
734 an intersection between the DEGs detected at all time points between both years was built.  
735 To determine a subset of putatively ripening-regulatory genes, the intersection between  
736 both years covering the development stages BBCH61 (begin of flowering) to BBCH79 (one  
737 developmental BBCH stage before véraison) was used (time points 2014: DAF0-35; 2017:  
738 DAF0-42). Furthermore, a set of véraison specific genes was defined from the the DEGs  
739 detected at the intersection of development stages BBCH79 (one developmental BBCH stage  
740 before véraison) to BBCH81 (begin of ripening / véraison; time points 2014: DAF35-41; 2017:  
741 DAF42-49). To test for biological relevance of the subsets, all DEGs were screened to their  
742 occurrence in similar relevant studies [25, 26, 28, 29, 33, 41, 78, 79].

743

## 744 **Visualization of gene numbers newly appearing as differentially expressed**

745 To visualize appearance of DEGs over time, a stacked bar plot script was set up using the R  
746 package 'plotly' (v. 4.9.2.1) [80]. Each bar represents the amount of DEGs of a given time  
747 point or condition. In order to track groups of DEGs newly appearing at a given time point  
748 throughout the following time points, the colorshade representing the group of DEGs  
749 remains the same.

750

## 751 **Pathway enrichment analysis**

752 To search for possible targets in known pathways of grapevine, a pathway enrichment  
753 analysis using the tool VitisPathways [81] was performed. To achieve a reliable enrichment,  
754 1000 permutations, a Fisher's exact test of  $p < 0.05$  and permuted p-value  $< 0.1$  were set.  
755 Thus, all significant enriched pathway genes and their relations can be displayed in VitisNet  
756 [82], a specific molecular network for grapevine.

757

## 758 **Heatmaps**

759 As an extension to assignment of genes to biosynthesis pathways, the genes were also  
760 filtered for annotation as coding for transcription factors (TFs). This filter was based on the  
761 annotation information transferred from Mercator and RefSeq (see above). To look at the  
762 entire family of *R2R3-MYB* TF genes, the list of *MYB* genes identified via MapMan was  
763 extended by additional grapevine *R2R3-MYB* gene family members that have been  
764 characterized [6, 7]. The *R2R3-MYB* genes detected among the intersecting DEGs were  
765 displayed in heatmaps addressing the four individual time series (2 cultivars, 2 years) using  
766 the R package 'pheatmap' (v. 2.1.3) [83]. Predictions for phylogenetic relationships were  
767 deduced from PhyloGenes v. 2.2 [84].

768

769 **Abbreviations**

770 ABA abscisic acid

771 DAF days after begin of flowering

772 DEGs differentially expressed genes

773 PNP Pinot Noir Precoce

774 PN Pinot Noir

775 LFC log<sub>2</sub>fold change

776 PADJ adjusted p-value

777 TF transcription factor

778 TPM transcripts per kilobase million

779

780 **Declarations**

781 **Ethics approval and consent to participate**

782 Not applicable

783

784 **Consent for publication**

785 Not applicable

786

787 **Availability of data and material**

788 The FASTQ files containing all RNA-Seq reads (PN2014, PNP2014, PN2017 and PNP2017)

789 have been deposited at the European Nucleotide Archive (ENA) according to the INTEGRAPÉ

790 guidelines under the accession numbers PRJEB39262, PRJEB39261, PRJEB39264 and

791 PRJEB39263, respectively (see Additional file 1: Tables S19 to S22). All scripts developed for

792 this study are available on GitHub [<https://github.com/bpucker>;  
793 <https://github.com/jenthein>].

794

#### 795 **Competing interests**

796 The authors declare that they have no competing interests

797

#### 798 **Funding**

799 This project was funded by BMBF/PtJ (FKZ 031A3496).

800

#### 801 **Authors' contributions**

802 Sampling and phenotyping were done at the JKI (Julius Kühn-Institute, Institute for  
803 Grapevine Breeding Geilweilerhof, Siebeldingen, Germany). Sequencing and data analysis  
804 were performed at Bielefeld University, Faculty of Biology & Center for Biotechnology  
805 (CeBiTec). Organization, supervision at Bielefeld University and parts of sampling were done  
806 by DH. KH, AK and FS coordinated weekly sampling, phenotyping, and image capture for  
807 documentation. Logistic work was done by KH. The design of the experiments was set up by  
808 FS, DH and KH. RNA isolation and cDNA synthesis were carried out by DH and PV. PV  
809 accomplished library preparation and sequencing. RT and KH supervised the work at JKI  
810 Geilweilerhof. LH performed the SSR analysis. BW supervised the work at Bielefeld  
811 University. FS, KH, RT and BW acquired project funding and wrote the project proposal. All  
812 bioinformatic data analyses, creation of figures, tables and writing of the manuscript were  
813 performed by JT with the help of DH. JT and BW drafted the manuscript. All authors have  
814 read and approved the final manuscript.

815

## 816 **Acknowledgements**

817 We would like to thank Boas Pucker for providing several python scripts for handling large  
818 data sets as well as helpful comments on the manuscript, Katharina Frey-Sielemann for help  
819 visualizing the DEG distributions and Wiebke Halpape for providing the GO annotation  
820 enquiry. We also thank Willy Keller for the excellent technical support. We are very grateful  
821 to the Bioinformatics Resource Facility support team of the CeBiTec for providing computing  
822 infrastructure and excellent technical support. This publication is based in part upon  
823 contributions from COST Action CA 17111 INTEGRAPPE, supported by COST (European  
824 Cooperation in Science and Technology); the authors thank BMBF/PtJ for funding in the  
825 context of IPAS (project acronym novisys). The authors from UniBi also wish to thank the  
826 other members of the Chair of Genetics and Genomics of Plants for their support. We would  
827 also like to thank the Open Access Publication Funds of Bielefeld University for funding the  
828 publication charge.

829

## 830 **Supplementary material**

831 **Additional file 1: Table S1:** Clonal relation of PN and PNP confirmed by 24 SSR markers

832 **Additional file 1: Table S2** - Sampling and phenotypical observations (BBCH) for 2014

833 **Additional file 1: Table S3** - Sampling and phenotypical observations (BBCH) for 2017

834 **Additional file 1: Table S4** - Pearsonr correlations of gene expression values over time  
835 between both years

836 **Additional file 1: Table S5** - Top 500 genes influencing principal component PC1

837 **Additional file 1: Table S6** - Top 500 genes influencing principal component PC2

838 **Additional file 1: Table S7** - Cluster memberships of clusters obtained from the  
839 clusteranalysis PN/PNP

840 **Additional file 1: Table S8** - Cluster memberships of clusters obtained from the cluster  
841 analysis PN

842 **Additional file 1: Table S9** - Cluster memberships of clusters obtained from the cluster  
843 analysis PNP

844 **Additional file 1: Table S10** - GO term enrichment for the clusters from the cluster analysis  
845 of PN/PNP

846 **Additional file 1: Table S11** - GO term enrichment for the clusters from the cluster analysis  
847 of PN

848 **Additional file 1: Table S12** - GO term enrichment for the clusters from the cluster analysis  
849 of PNP

850 **Additional file 1: Table S13** - Differentially expressed genes between PN and PNP in both  
851 years and filtering steps

852 **Additional file 1: Table S14** - Overlap of 12 ripening regulatory DEGs (time points: DAF0-35  
853 from 2014 intersecting with DAF0-42 from 2017) and 388 véraison-specific DEGs (time  
854 points: DAF 35+41 from 2014 intersecting with DAF42+49 from 2017) with previous  
855 transcriptomic grapevine studies.

856 **Additional file 1: Table S15** - VitisNet enrichment for intersecting DEGs

857 **Additional file 1: Table S16** - VitisNet enrichment for regulatory DEGs

858 **Additional file 1: Table S17** - VitisNet enrichment for véraison specific DEGs

859 **Additional file 1: Table S18** - Up- & Down-regulated TFs among the DEGs

860 **Additional file 1: Table S19** - ENA sample identifier and metadata linked to the study for PNP  
861 RNA-Seq reads from 2014 (PRJEB39262)

862 **Additional file 1: Table S20** - ENA sample identifier and metadata linked to the study for PN  
863 RNA-Seq reads from 2014 (PRJEB39261)

864 **Additional file 1: Table S21** - ENA sample identifier and metadata linked to the study for PNP  
865 RNA-Seq reads from 2017 (PRJEB39264)

866 **Additional file 1: Table S22** - ENA sample identifier and metadata linked to the study for PN  
867 RNA-Seq reads from 2017 (PRJEB39263)

868

869 **Additional file 2: Figure S1** - Cluster analyses of PN/PNP in both years (A), PN in both years  
870 (B) and PNP in both years (C)

871 **Additional file 2: Figure S2** - Heatmap of all MYB-TFs gene expression among the DEGs for  
872 PN and PNP in both years



873 **Additional file 2: Figure S3** - Expression patterns of genes from the ripening-regulatory gene

874 set

875

876

877 **References**

878

- 879 1. Kuhn N, Guan L, Dai ZW, Wu BH, Lauvergeat V, Gomès E, Li SH, Godoy F, Arce-Johnson P,  
880 Delrot S: **Berry ripening: recently heard through the grapevine.** *Journal of Experimental*  
881 *Botany* 2014, **65**(16):4543-4559.
- 882 2. Coombe BG: **Research on development and ripening of the grape berry.** *American Journal of*  
883 *Enology and Viticulture* 1992, **43**(1):101-110.
- 884 3. Lorenz DH, Eichhorn KW, Bleiholder H, Klose R, Meier U, Weber E: **Phenological growth stages**  
885 **of the grapevine (*Vitis vinifera* L. ssp. *vinifera*) - Codes and descriptions according to the**  
886 **extended BBCH scale.** *Australian Journal of Grape and Wine Research* 1995, **1**(2):100-103.
- 887 4. Bleiholder H, Weber E, Feller C, Hess M, Wicke H, Meier U, van den Boom T, Lancashire PD,  
888 Buhr L, Hack H *et al*: **Growth stages of mono- and dicotyledonous plants - BBCH Monograph:**  
889 **Federal Biological Research Centre for Agriculture and Forestry; 2001.**
- 890 5. Dubos C, Stracke R, Grotewold E, Weisshaar B, Martin C, Lepiniec L: **MYB transcription factors**  
891 **in Arabidopsis.** *Trends in Plant Science* 2010, **15**(10):573-581.
- 892 6. Matus JT, Aquea F, Arce-Johnson P: **Analysis of the grape MYB R2R3 subfamily reveals**  
893 **expanded wine quality-related clades and conserved gene structure organization across *Vitis***  
894 **and Arabidopsis genomes.** *BMC Plant Biology* 2008, **8**:83.
- 895 7. Wong DCJ, Schlechter R, Vannozzi A, Holl J, Hmam I, Bogs J, Tornielli GB, Castellarin SD,  
896 Matus JT: **A systems-oriented analysis of the grapevine R2R3-MYB transcription factor family**  
897 **uncovers new insights into the regulation of stilbene accumulation.** *DNA Research* 2016,  
898 **23**(5):451-466.
- 899 8. Delrot S, Grimplet J, Carbonell-Bejerano P, Schwandner A, Bert P-F, Bavaresco L, Costa LD, Di  
900 Gaspero G, Duchêne E, Hausmann L *et al*: **Genetic and Genomic Approaches for Adaptation of**  
901 **Grapevine to Climate Change.** In: *Genomic Designing of Climate-Smart Fruit Crops.* Edited by  
902 Kole C. Cham (Switzerland): Springer; 2020: 157-270.
- 903 9. Fenn MA, Giovannoni JJ: **Phytohormones in Fruit Development and Maturation.** *The Plant*  
904 *Journal* 2020.
- 905 10. Osorio S, Scossa F, Fernie AR: **Molecular regulation of fruit ripening.** *Frontiers in Plant Science*  
906 2013, **4**:198.
- 907 11. Sun L, Zhang M, Ren J, Qi J, Zhang G, Leng P: **Reciprocity between abscisic acid and ethylene**  
908 **at the onset of berry ripening and after harvest.** *BMC Plant Biology* 2010, **10**:257.
- 909 12. Pilati S, Bagagli G, Sonogo P, Moretto M, Brazzale D, Castorina G, Simoni L, Tonelli C, Guella G,  
910 Engelen K *et al*: **Abscisic Acid Is a Major Regulator of Grape Berry Ripening Onset: New**  
911 **Insights into ABA Signaling Network.** *Frontiers in Plant Science* 2017, **8**:1093.
- 912 13. Zhu Z, Li G, Yan C, Liu L, Zhang Q, Han Z, Li B: **DRL1, Encoding A NAC Transcription Factor, Is**  
913 **Involved in Leaf Senescence in Grapevine.** *International Journal of Molecular Sciences* 2019,  
914 **20**(11):2678.

- 915 14. Rossdeutsch L, Edwards E, Cookson SJ, ., Barrieu F, Gambetta GA, Delrot S, Ollat N: **ABA-**  
916 **mediated responses to water deficit separate grapevine genotypes by their genetic**  
917 **background.** *BMC Plant Biology* 2016, **16**(91):s12870-12016-10778-12874.
- 918 15. Coelho J, Almeida-Trapp M, Pimentel D, Soares F, Reis P, Rego C, Mithöfer A, Fortes AM: **The**  
919 **study of hormonal metabolism of Trincadeira and Syrah cultivars indicates new roles of**  
920 **salicylic acid, jasmonates, ABA and IAA during grape ripening and upon infection with**  
921 **Botrytis cinerea.** *Plant Science* 2019, **283**:266-277.
- 922 16. Chervin C, El-Kereamy A, Roustan J-P, Latché A, Lamon J, Bouzayen M: **Ethylene seems**  
923 **required for the berry development and ripening in grape, a non-climacteric fruit.** *Plant*  
924 *Science* 2004, **167**(6):1301-1305.
- 925 17. Böttcher C, Burbidge CA, Boss PK, Davies C: **Interactions between ethylene and auxin are**  
926 **crucial to the control of grape (*Vitis vinifera* L.) berry ripening.** *BMC Plant Biology* 2013,  
927 **13**:222.
- 928 18. Böttcher C, Harvey K, Forde CG, Boss PK, Davies C: **Auxin treatment of pre-veraison grape**  
929 **(*Vitis vinifera* L.) berries both delays ripening and increases the synchronicity of sugar**  
930 **accumulation.** *Australian Journal of Grape and Wine Research* 2011, **17**(1):1-8.
- 931 19. Ziliotto F, Corso M, Rizzini FM, Rasori A, Botton A, Bonghi C: **Grape berry ripening delay**  
932 **induced by a pre-véraison NAA treatment is paralleled by a shift in the expression pattern of**  
933 **auxin- and ethylene-related genes.** *BMC Plant Biology* 2012, **12**:185.
- 934 20. Seymour GB, Ostergaard L, Chapman NH, Knapp S, Martin C: **Fruit Development and Ripening.**  
935 *Annual Review of Plant Biology* 2013, **64**:219-241.
- 936 21. Giovannoni J, Nguyen C, Ampofo B, Zhong S, Fei Z: **The Epigenome and Transcriptional**  
937 **Dynamics of Fruit Ripening.** *Annual Review of Plant Biology* 2017, **68**:61-84.
- 938 22. Karlova R, Chapman N, David K, Angenent GC, Seymour GB, de Maagd RA: **Transcriptional**  
939 **control of fleshy fruit development and ripening.** *J Exp Bot* 2014, **65**(16):4527-4541.
- 940 23. Wang R, Tavano E, Lammers M, Martinelli AP, Angenent GC, de Maagd RA: **Re-evaluation of**  
941 **transcription factor function in tomato fruit development and ripening with CRISPR/Cas9-**  
942 **mutagenesis.** *Scientific Reports* 2019, **9**(1):1696.
- 943 24. Serrano A, Espinoza C, Armijo G, Inostroza-Blancheteau C, Poblete E, Meyer-Regueiro C, Arce  
944 A, Parada F, Santibanez C, Arce-Johnson P: **Omics Approaches for Understanding Grapevine**  
945 **Berry Development: Regulatory Networks Associated with Endogenous Processes and**  
946 **Environmental Responses.** *Frontiers in Plant Science* 2017, **8**:1486.
- 947 25. Ma Q, Yang J: **Transcriptome profiling and identification of the functional genes involved in**  
948 **berry development and ripening in *Vitis vinifera*.** *Gene* 2019, **680**:84-96.
- 949 26. Fasoli M, Richter CL, Zenoni S, Bertini E, Vitulo N, Dal Santo S, Dokoozlian N, Pezzotti M,  
950 Torielli GB: **Timing and Order of the Molecular Events Marking the Onset of Berry Ripening**  
951 **in Grapevine.** *Plant Physiology* 2018, **178**(3):1187-1206.
- 952 27. Sun R, He F, Lan Y, Xing R, Liu R, Pan Q, Wang J, Duan C: **Transcriptome comparison of**  
953 **Cabernet Sauvignon grape berries from two regions with distinct climate.** *Journal of Plant*  
954 *Physiology* 2015, **178**:43-54.

- 955 28. Delfino P, Zenoni S, Imanifard Z, Tornielli GB, Bellin D: **Selection of candidate genes controlling**  
956 **veraison time in grapevine through integration of meta-QTL and transcriptomic data.** *BMC*  
957 *Genomics* 2019, **20**(1):739.
- 958 29. Zenoni S, Ferrarini A, Giacomelli E, Xumerle L, Fasoli M, Malerba G, Bellin D, Pezzotti M,  
959 Delledonne M: **Characterization of transcriptional complexity during berry development in**  
960 **Vitis vinifera using RNA-Seq.** *Plant Physiology* 2010, **152**(4):1787-1795.
- 961 30. Xu L, Yue Q, Xiang G, Bian F, Yao Y: **Melatonin promotes ripening of grape berry via increasing**  
962 **the levels of ABA, H<sub>2</sub>O<sub>2</sub>, and particularly ethylene.** *Horticulture Research* 2018, **5**:41.
- 963 31. Griesser M, Martinez SC, Eitle MW, Warth B, Andre CM, Schuhmacher R, Forneck A: **The**  
964 **ripening disorder berry shrivel affects anthocyanin biosynthesis and sugar metabolism in**  
965 **Zweigelt grape berries.** *Planta* 2018, **247**(2):471-481.
- 966 32. Zarrouk O, Brunetti C, Egipto R, Pinheiro C, Genebra T, Gori A, Lopes CM, Tattini M, Chaves  
967 MM: **Grape Ripening Is Regulated by Deficit Irrigation/Elevated Temperatures According to**  
968 **Cluster Position in the Canopy.** *Frontiers in Plant Science* 2016, **7**:1640.
- 969 33. Massonnet M, Fasoli M, Tornielli GB, Altieri M, Sandri M, Zuccolotto P, Paci P, Gardiman M,  
970 Zenoni S, Pezzotti M: **Ripening Transcriptomic Program in Red and White Grapevine Varieties**  
971 **Correlates with Berry Skin Anthocyanin Accumulation.** *Plant Physiology* 2017, **174**(4):2376-  
972 2396.
- 973 34. Maul E, Sudharma KN, Ganesch A, Brühl U, Hundemer M, Kecke S, Mahler-Ries A, Marx G,  
974 Schreiber T, Walk M *et al*: **30 Years VIVC - Vitis International Variety Catalogue**  
975 **(www.vivc.de).** In: *XI International Conference on Grapevine Breeding and Genetics; Yanqing,*  
976 *Beijing, China.* 2014.
- 977 35. Robinson J, Harding J, Vouillamoz J: **Wine Grapes: A complete guide to 1,368 vine varieties,**  
978 **including their origins and flavours:** Penguin Books; 2012.
- 979 36. Roy-Chevrier J: **Ampelographie retrospective.** Paris; 1900.
- 980 37. Pucker B, Schwandner A, Becker S, Hausmann L, Viehover P, Topfer R, Weisshaar B, Holtgrawe  
981 D: **RNA-Seq Time Series of Vitis vinifera Bud Development Reveals Correlation of Expression**  
982 **Patterns with the Local Temperature Profile.** *Plants* 2020, **9**(11):1548.
- 983 38. Dal Santo S, Tornielli GB, Zenoni S, Fasoli M, Farina L, Anesi A, Guzzo F, Delledonne M, Pezzotti  
984 M: **The plasticity of the grapevine berry transcriptome.** *Genome Biology* 2013, **14**(6):R54.
- 985 39. Vannozzi A, Dry IB, Fasoli M, Zenoni S, Lucchin M: **Genome-wide analysis of the grapevine**  
986 **stilbene synthase multigenic family: genomic organization and expression profiles upon**  
987 **biotic and abiotic stresses.** *BMC Plant Biology* 2012, **12**:130.
- 988 40. Zyprian E, Ochßner I, Schwander F, Šimon S, Hausmann L, Bonow-Rex M, Moreno-Sanz P,  
989 Grando MS, Wiedemann-Merdinoglu S, Merdinoglu D *et al*: **Quantitative trait loci affecting**  
990 **pathogen resistance and ripening of grapevines.** *Molecular Genetics and Genomics* 2016,  
991 **291**(4):1573-1594.
- 992 41. Palumbo MC, Zenoni S, Fasoli M, Massonnet M, Farina L, Castiglione F, Pezzotti M, Paci P:  
993 **Integrated network analysis identifies fight-club nodes as a class of hubs encompassing key**  
994 **putative switch genes that induce major transcriptome reprogramming during grapevine**  
995 **development.** *The Plant Cell* 2014, **26**(12):4617-4635.

- 996 42. Burger AL, Zwiegelaar JP, Botha FC: **Characterisation of the gene encoding the Merlot**  
997 **ripening-induced protein 1 (mrip1): evidence that this putative protein is a distinct member**  
998 **of the plant proline-rich protein family.** *Plant Science* 2004, **167**(5):1075-1089.
- 999 43. Davies C, Robinson SP: **Differential screening indicates a dramatic change in mRNA profiles**  
1000 **during grape berry ripening. Cloning and characterization of cDNAs encoding putative cell**  
1001 **wall and stress response proteins.** *Plant Physiology* 2000, **122**(3):803-812.
- 1002 44. Qi T, Huang H, Song S, Xie D: **Regulation of Jasmonate-Mediated Stamen Development and**  
1003 **Seed Production by a bHLH-MYB Complex in Arabidopsis.** *The Plant Cell* 2015, **27**(6):1620-  
1004 1633.
- 1005 45. Czermel S, Stracke R, Weisshaar B, Cordon N, Harris NN, Walker AR, Robinson SP, Bogs J: **The**  
1006 **grapevine R2R3-MYB transcription factor VvMYBF1 regulates flavonol synthesis in**  
1007 **developing grape berries.** *Plant Physiology* 2009, **151**(3):1513-1530.
- 1008 46. Bogs J, Jaffe FW, Takos AM, Walker AR, Robinson SP: **The grapevine transcription factor**  
1009 **VvMYBPA1 regulates proanthocyanidin synthesis during fruit development.** *Plant Physiology*  
1010 2007, **143**(3):1347-1361.
- 1011 47. Koyama K, Numata M, Nakajima I, Goto-Yamamoto N, Matsumura H, Tanaka N: **Functional**  
1012 **characterization of a new grapevine MYB transcription factor and regulation of**  
1013 **proanthocyanidin biosynthesis in grapes.** *Journal of Experimental Botany* 2014, **65**(15):4433-  
1014 4449.
- 1015 48. Cavallini E, Matus JT, Finezzo L, Zenoni S, Loyola R, Guzzo F, Schlechter R, Ageorges A, Arce-  
1016 Johnson P, Tornielli GB: **The phenylpropanoid pathway is controlled at different branches by**  
1017 **a set of R2R3-MYB C2 repressors in grapevine.** *Plant Physiology* 2015, **167**(4):1448-1470.
- 1018 49. Matus JT, Cavallini E, Loyola R, Holl J, Finezzo L, Dal Santo S, Vialet S, Commisso M, Roman F,  
1019 Schubert A *et al*: **A group of grapevine MYBA transcription factors located in chromosome 14**  
1020 **control anthocyanin synthesis in vegetative organs with different specificities compared with**  
1021 **the berry color locus.** *The Plant Journal* 2017, **91**(2):220-236.
- 1022 50. Vannozzi A, Wong DCJ, Holl J, Hmam I, Matus JT, Bogs J, Ziegler T, Dry I, Barcaccia G, Lucchin  
1023 M: **Combinatorial Regulation of Stilbene Synthase Genes by WRKY and MYB Transcription**  
1024 **Factors in Grapevine (*Vitis vinifera* L.).** *Plant and Cell Physiology* 2018, **59**(5):1043-1059.
- 1025 51. Forlani S, Masiero S, Mizzotti C: **Fruit ripening: the role of hormones, cell wall modifications,**  
1026 **and their relationship with pathogens.** *Journal of Experimental Botany* 2019, **70**(11):2993-  
1027 3006.
- 1028 52. Dal Santo S, Vannozzi A, Tornielli GB, Fasoli M, Venturini L, Pezzotti M, Zenoni S: **Genome-wide**  
1029 **analysis of the expansin gene superfamily reveals grapevine-specific structural and**  
1030 **functional characteristics.** *PLoS One* 2013, **8**(4):e62206.
- 1031 53. Du M, Spalding EP, Gray WM: **Rapid Auxin-Mediated Cell Expansion.** *Annual Review of Plant*  
1032 *Biology* 2020, **71**:379-402.
- 1033 54. Guillaumie S, Fouquet R, Kappel C, Camps C, Terrier N, Moncomble D, Dunlevy JD, Davies C,  
1034 Boss PK, Delrot S: **Transcriptional analysis of late ripening stages of grapevine berry.** *BMC*  
1035 *Plant Biology* 2011, **11**:165.

- 1036 55. Li Z, Zhang C, Guo Y, Niu W, Wang Y, Xu Y: **Evolution and expression analysis reveal the**  
1037 **potential role of the HD-Zip gene family in regulation of embryo abortion in grapes (*Vitis***  
1038 ***vinifera* L.). *BMC Genomics* 2017, **18**(1):744.**
- 1039 56. Cui M, Wang W, Guo F, Fan X, Guan L, Zheng T, Zhu X, Jia H, Fang J, Wang C *et al*:  
1040 **Characterization and temporal–spatial expression analysis of LEC1 gene in the development**  
1041 **of seedless berries in grape induced by gibberellin. *Plant Growth Regulation* 2020, **90**(3):585-**  
1042 **596.**
- 1043 57. Jo L, Pelletier JM, Harada JJ: **Central role of the LEAFY COTYLEDON1 transcription factor in**  
1044 **seed development. *Journal of Integrative Plant Biology* 2019, **61**(5):564-580.**
- 1045 58. Liu Q, Sun Y, Su W, Yang J, Liu X, Wang Y, Wang F, Li H, Li X: **Species-specific size expansion and**  
1046 **molecular evolution of the oleosins in angiosperms. *Gene* 2012, **509**(2):247-257.**
- 1047 59. Qian X, Liu Y, Zhang G, Yan A, Wang H, Wang X, Pan Q, Xu H, Sun L, Zhu B: **Alcohol**  
1048 **acyltransferase gene and ester precursors differentiate composition of volatile esters in**  
1049 **three interspecific hybrids of *Vitis labrusca* V. *Vinifera* during berry development period.**  
1050 ***Food Chemistry* 2019, **295**:234-246.**
- 1051 60. Bourdais G, Burdiak P, Gauthier A, Nitsch L, Salojarvi J, Rayapuram C, Idanheimo N, Hunter K,  
1052 Kimura S, Merilo E *et al*: **Large-Scale Phenomics Identifies Primary and Fine-Tuning Roles for**  
1053 **CRKs in Responses Related to Oxidative Stress. *PLoS Genetics* 2015, **11**(7):e1005373.**
- 1054 61. Dallakyan M, Zyprian E, Maul E, Yesayan A, Hovhannisyan N: **Genetic characterization of rape**  
1055 **varieties in Armenia. *Vitis* 2015, **54**:23-26.**
- 1056 62. Bolger AM, Lohse M, Usadel B: **Trimmomatic: a flexible trimmer for Illumina sequence data.**  
1057 ***Bioinformatics* 2014, **30**(15):2114-2120.**
- 1058 63. **FastQC, a quality control tool for high throughput sequence data.**  
1059 [<http://www.bioinformatics.babraham.ac.uk/projects/fastqc/> ]
- 1060 64. Jaillon O, Aury JM, Noel B, Policriti A, Clepet C, Casagrande A, Choisne N, Aubourg S, Vitulo N,  
1061 Jubin C *et al*: **The grapevine genome sequence suggests ancestral hexaploidization in major**  
1062 **angiosperm phyla. *Nature* 2007, **449**(7161):463-467.**
- 1063 65. Kim D, Langmead B, Salzberg SL: **HISAT: a fast spliced aligner with low memory requirements.**  
1064 ***Nature Methods* 2015, **12**(4):357-360.**
- 1065 66. Kim D, Paggi JM, Park C, Bennett C, Salzberg SL: **Graph-based genome alignment and**  
1066 **genotyping with HISAT2 and HISAT-genotype. *Nature Biotechnology* 2019, **37**(8):907-915.**
- 1067 67. Liao Y, Smyth GK, Shi W: **featureCounts: an efficient general purpose program for assigning**  
1068 **sequence reads to genomic features. *Bioinformatics* 2014, **30**(7):923-930.**
- 1069 68. Zhao S, Ye Z, Stanton R: **Misuse of RPKM or TPM normalization when comparing across**  
1070 **samples and sequencing protocols. *RNA* 2020, **26**(8):903-909.**
- 1071 69. Virtanen P, Gommers R, Oliphant TE, Haberland M, Reddy T, Cournapeau D, Burovski E,  
1072 Peterson P, Weckesser W, Bright J *et al*: **SciPy 1.0: fundamental algorithms for scientific**  
1073 **computing in Python. *Nature Methods* 2020, **17**(3):261-272.**



- 1074 70. Love MI, Huber W, Anders S: **Moderated estimation of fold change and dispersion for RNA-**  
1075 **seq data with DESeq2.** *Genome Biology* 2014, **15**(12):550.
- 1076 71. **R: A language and environment for statistical computing** [<https://www.R-project.org/>]
- 1077 72. Thimm O, Bläsing O, Gibon Y, Nagel A, Meyer S, Krüger P, Selbig J, Müller LA, Rhee SY, Stitt M:  
1078 **MAPMAN: a user-driven tool to display genomics data sets onto diagrams of metabolic**  
1079 **pathways and other biological processes.** *The Plant Journal* 2004, **37**(6):914-939.
- 1080 73. Lohse M, Nagel A, Herter T, May P, Schroda M, Zrenner R, Tohge T, Fernie AR, Stitt M, Usadel  
1081 **B: Mercator: a fast and simple web server for genome scale functional annotation of plant**  
1082 **sequence data.** *Plant, Cell & Environment* 2014, **37**(5):1250-1258.
- 1083 74. Pruitt KD, Tatusova T, Maglott DR: **NCBI reference sequences (RefSeq): a curated non-**  
1084 **redundant sequence database of genomes, transcripts and proteins.** *Nucleic Acids Research*  
1085 2007, **35**(Database issue):D61-65.
- 1086 75. Altschul SF, Gish W, Miller W, Myers EW, Lipman DJ: **Basic local alignment search tool.** *Journal*  
1087 *of Molecular Biology* 1990, **215**(3):403-410.
- 1088 76. Alexa A, Rahnenfuhrer J, Lengauer T: **Improved scoring of functional groups from gene**  
1089 **expression data by decorrelating GO graph structure.** *Bioinformatics* 2006, **22**(13):1600-1607.
- 1090 77. Abu-Jamous B, Kelly S: **Clust: automatic extraction of optimal co-expressed gene clusters**  
1091 **from gene expression data.** *Genome Biology* 2018, **19**:172.
- 1092 78. Zenoni S, D'Inca E, Tornielli GB: **Genetic dissection of grape berry ripening control: defining a**  
1093 **role for NAC transcription factors.** *Acta Horticulturae* 2019(1248):387-402.
- 1094 79. Wei L, Cao Y, Cheng J, Xiang J, Shen B, Wu J: **Comparative transcriptome analyses of a table**  
1095 **grape 'Summer Black' and its early-ripening mutant 'Tiangong Moyu' identify candidate**  
1096 **genes potentially involved in berry development and ripening.** *Journal of Plant Interactions*  
1097 2020, **15**(1):213-222.
- 1098 80. Sievert C: **Interactive Web-Based Data Visualization with R, plotly, and shiny:** CRC Press;  
1099 2020.
- 1100 81. Osier MV: **VitisPathway: gene pathway analysis for V. vinifera.** *Vitis* 2016, **55**:129-133.
- 1101 82. Grimplet J, Van Hemert J, Carbonell-Bejerano P, Díaz-Riquelme J, Dickerson J, Fennell A,  
1102 Pezzotti M, Martínez-Zapater JM: **Comparative analysis of grapevine whole-genome gene**  
1103 **predictions, functional annotation, categorization and integration of the predicted gene**  
1104 **sequences.** *BMC Research Notes* 2012, **5**:213.
- 1105 83. **pheatmap: Pretty Heatmaps. R package version 1.0.12** [[https://CRAN.R-](https://CRAN.R-project.org/package=pheatmap)  
1106 [project.org/package=pheatmap](https://CRAN.R-project.org/package=pheatmap)]
- 1107 84. Zhang P, Berardini TZ, Ebert D, Li Q, Mi H, Muruganujan A, Prithvi T, Reiser L, Sawant S, Thomas  
1108 PD *et al*: **PhyloGenes: An online phylogenetics and functional genomics resource for plant**  
1109 **gene function inference.** *Plant Direct* 2020, **4**(12):e00293.

1110
